**1** Tuba1a is uniquely important for axon guidance through midline commissural structures

**2**

**3** Georgia Buscaglia<sup>1</sup>, Jayne Aiken<sup>1,2</sup>, Katelyn J. Hoff<sup>2</sup>, Kyle R. Northington<sup>1</sup>, Emily A. Bates<sup>1</sup>

**4**

**5** 1. Department of Pediatrics, University of Colorado Anschutz Medical Campus

**6** 2. Department of Cell and Developmental Biology, University of Colorado Anschutz Medical

**7** Campus

**8**

**9** Corresponding Author:

**10** Emily Anne Bates,

**11** 12800 E 19<sup>th</sup> Avenue, RC1 North Mail stop 8313, Aurora, CO 80045

**12** Email: [Emily.Bates@CUAnschutz.edu](mailto:Emily.Bates@CUAnschutz.edu)

**13**

**14** Abstract

**15** Developing neurons undergo dramatic morphological changes to appropriately migrate

**16** and extend axons to make synaptic connections. The microtubule cytoskeleton, made of  $\alpha/\beta$ -

**17** tubulin dimers, drives neurite outgrowth, promotes neuronal growth cone responses, and

**18** facilitates intracellular transport of critical cargoes during neurodevelopment. *TUBA1A*

**19** constitutes the majority of  $\alpha$ -tubulin in the developing brain and mutations to *TUBA1A* in

**20** humans cause severe brain malformations accompanied by varying neurological defects,

**21** collectively termed tubulinopathies. Studies of *TUBA1A* function *in vivo* have been limited by

**22** the presence of multiple genes encoding highly similar tubulin proteins, which prevents

**23** TUBA1A-specific antibody generation and makes genetic manipulation challenging. Here we

24 present a novel tagging method for studying and manipulating *TUBA1A* in cells without  
25 impairing tubulin function. Using this tool, we show that a *TUBA1A* loss-of-function mutation  
26 *TUBA1A<sup>N102D</sup>* (*TUBA1A<sup>ND</sup>*), reduced the amount of TUBA1A protein and prevented  
27 incorporation of TUBA1A into microtubule polymers. Reduced Tuba1a  $\alpha$ -tubulin in  
28 heterozygous *Tuba1a<sup>ND/+</sup>* mice significantly impacted axon extension and impaired formation of  
29 forebrain commissures. Neurons with reduced Tuba1a caused by *Tuba1a<sup>ND</sup>* had altered  
30 microtubule dynamics and slower neuron outgrowth compared to controls. Neurons deficient in  
31 Tuba1a failed to localize microtubule associated protein-1b (Map1b) to the developing growth  
32 cone, likely impacting reception of developmental guidance cues. Overall, we show that reduced  
33 Tuba1a is sufficient to support neuronal migration, but not axon guidance, and provide  
34 mechanistic insight as to how *TUBA1A* tunes microtubule function to support neurodevelopment.

35

## 36 Introduction

37 Mammalian brain development is a complex process that requires precise coordination of  
38 multiple cell types and extracellular cues to form a fully specified tissue. Despite many advances  
39 in understanding the cellular and molecular players involved in brain development, there is still  
40 much that remains unknown. Insights into the molecular pathways governing neurodevelopment  
41 can be gained from studying genetic mutations that disrupt specific aspects of brain  
42 development. Severe cortical and neurodevelopmental phenotypes associated with mutations that  
43 disrupt tubulin genes, termed tubulinopathies, have recently been described in humans [1-4].  
44 Tubulinopathy mutations cause a spectrum of neurodevelopmental phenotypes, but frequently  
45 involve cortical malformations such as lissencephaly, agenesis or hypoplasia of the corpus  
46 callosum, and cerebellar hypoplasia [1, 2, 4, 5]. Recent studies of human tubulinopathy

47 mutations have revealed that each variant may impact different aspects of microtubule function,  
48 such as protein folding, polymerization competency, and microtubule-associated protein (MAP)-  
49 binding, among others [6-9]. Tubulin mutations can therefore be used to interrogate the  
50 requirement for specific aspects of microtubule function throughout neurodevelopment.

51         Developing neurons must migrate to the correct location, extend axons to meet  
52 sometimes distant synaptic partners and form functional connections. Throughout this process,  
53 neurons undergo dramatic morphological changes that require coordinated interaction between  
54 the cytoskeleton and the extracellular environment. In post-mitotic neurons, microtubule  
55 polymers made of  $\alpha/\beta$ -tubulin dimers facilitate nucleokinesis and cellular migration, support  
56 growth cone navigation, promote axon formation and form the tracks upon which intracellular  
57 trafficking occurs [10-13]. The microtubule network needs to be precisely controlled to fulfill  
58 diverse functions in neurons. Microtubule properties can be modulated through post-translational  
59 modifications (PTMs), association with MAPs and through the particular tubulin genes, or  
60 isotypes, that a cell expresses [14]. The human genome contains at least nine unique  $\alpha$ - and ten  
61 unique  $\beta$ -tubulin genes [15, 16]. The  $\alpha$ -tubulin isotype encoded by the gene *TUBA1A* is abundant  
62 in the brain and is the most highly expressed  $\alpha$ -tubulin in post-mitotic, developing neurons [17-  
63 19]. *TUBA1A* mutations are highly represented in cases of human tubulinopathies [20],  
64 suggesting that *TUBA1A* plays an important role in neurodevelopment. However, due to the high  
65 degree of sequence conservation between  $\alpha$ -tubulin genes, it has been historically challenging to  
66 study *TUBA1A* function *in vivo*, due to the limited availability of tools.

67         Mouse models harboring mutations to *Tubal1a* can be used as tools to interrogate the  
68 function of *Tubal1a* in the context of the neuronal milieu. As tubulin genes are often required for  
69 life and the nucleotide sequence between isotypes is conserved, generation of mutant mouse lines

70 to study *Tuba1a* function *in vivo* has been challenging. To date, only a handful of *Tuba1a* mutant  
71 mouse lines have been generated, three by ENU-induced forward genetic screens and one by  
72 site-directed CRISPR gene editing [21-23]. We previously showed that the ENU-induced  
73 *Tuba1a*<sup>N102D</sup> allele (*Tuba1a*<sup>ND</sup>) impaired microtubule function in both *S. cerevisiae* and mice  
74 [22]. Homozygous *Tuba1a*<sup>ND</sup> mice exhibit severely impaired brain development and are neonatal  
75 lethal, similar to phenotypes seen in the *Tuba1a*<sup>null</sup> and *Tuba1a*-R215\* mutant mice [20-22]. In  
76 homozygous *Tuba1a*<sup>ND</sup>, *Tuba1a*<sup>Null</sup> and *Tuba1a*-R215\* mice, as well as many *TUBA1A*  
77 tubulinopathy patients, cortical migration and commissural formation are severely disrupted,  
78 making it difficult to infer whether axon pathfinding is a direct consequence of altered *Tuba1a*  
79 function or if it is secondary to abnormal cortical layering and migration. *Tuba1a*<sup>ND/+</sup>  
80 heterozygous mutant mice have reduced *Tuba1a* function during brain development, which was  
81 sufficient to support survival and cortical migration resulting in normal cortical layers [22, 24],  
82 but does not support formation of commissures. Therefore, *Tuba1a*<sup>ND/+</sup> heterozygous animals can  
83 provide insight into how *Tuba1a* contributes specifically to axon pathfinding.

84 Here, we show that a reduction in developmental *Tuba1a* protein causes specific impairments  
85 in axon guidance through large brain commissures. Using a novel tubulin visualization  
86 technique, we demonstrate that the *TUBA1A*<sup>N102D</sup> mutation prevents incorporation of *TUBA1A*  
87 into microtubule polymers in cells. In mice, heterozygous *Tuba1a*<sup>ND/+</sup> brains fail to form the  
88 corpus callosum, anterior and hippocampal commissures due to apparent deficits in axon  
89 pathfinding through the midline. Cultured neurons from *Tuba1a*<sup>ND/+</sup> and wild-type cortices  
90 revealed that *Tuba1a*<sup>ND/+</sup> neurons have shorter neurites than wild-type and grow slower overall,  
91 potentially due to alterations in microtubule polymerization dynamics. Further, we demonstrate  
92 that *Tuba1a*<sup>ND/+</sup> neurons fail to localize at least one critical developmental MAP to the

**93** developing growth cone. Collectively, our data present evidence for precise mechanisms by  
**94** which loss of *Tuba1a* causes axonal pathfinding deficits during development.

**95**

## **96** Materials and Methods

### **97** *Animals*

**98** All animal research was performed in accordance with the Institutional Animal Care and Use  
**99** Committee at the University of Colorado School of Medicine. All mice used were maintained on  
**100** a 129S1/C57Bl6 genetic background. Mice were kept on a 12:12 light:dark cycle with *ad libitum*  
**101** access to food and water. *Tuba1a*<sup>ND</sup> and wild-type littermate mice were maintained on water  
**102** supplemented with 0.2g/L MgSO<sub>4</sub> to promote *Tuba1a*<sup>ND/+</sup> survival and ability to reproduce. For  
**103** timed mating male and female mice were introduced overnight and separated upon confirmation  
**104** of mating, which was then considered embryonic day 0.5. Male and female mice were  
**105** represented in all studies. All mice were genotyped by PCR amplification of tail DNA followed  
**106** by Sanger sequencing to differentiate homozygous or heterozygous *Tuba1a*<sup>ND/+</sup> mice from wild-  
**107** type. Primers used to amplify mouse DNA for genotyping were:  
**108** forward: TGGATGGTACGCTTGGTCTT; reverse: CTTTGCAGATGAAGTTCGCA; and  
**109** sequencing: GTCGAGGTTTCTACGACAGATATC.

### **110** *Histology*

**111** Mice were anesthetized and trans-cardially perfused with 0.1M NaCl and 4% paraformaldehyde  
**112** (PFA) for histology. Tissues of interest were dissected and post-fixed in 4% PFA. Tissue  
**113** sectioning was performed on a CM1520 cryostat (Leica, Wetzlar, Germany) and 30µm  
**114** cryosections were obtained for all histology. For luxol fast blue staining, sections from brain  
**115** were stained using a 0.1% luxol fast blue solution. For immunofluorescence studies PFA-fixed

**116** tissues or cells were blocked in phosphate-buffered saline (PBS) containing 5% goat serum or  
**117** bovine serum albumin (BSA) with 0.3% Triton-X 100. Primary and secondary antibodies were  
**118** diluted in PBS containing 1% BSA with 0.1% Triton-X 100.

**119** *Electron Microscopy*

**120** Mice used for electron microscopy were perfused with 0.1M NaCl and 2.5% glutaraldehyde 4%  
**121** PFA, after which the brain was dissected and post-fixed in 2.5% glutaraldehyde 4% PFA  
**122** overnight at 4°C. Following post-fixation, brains were sent for sectioning and imaging by the CU  
**123** School of Medicine Electron Microscopy Core facility.

**124** *Plasmids and Reagents*

**125** The hexahistidine (His6) epitope tag was inserted in the  $\alpha$ -tubulin internal loop region [25-27].  
**126** Codon optimization for *rattus norvegicus* (<https://www.idtdna.com/codonopt>) was used to  
**127** generate the His6 sequence CATCACCACCATCATCAC, which was inserted into the coding  
**128** region of human *TUBA1A* from the Mammalian Genome Collection (clone  
**129** ID:LIFESEQ6302156) between residues I42 and G43. Gibson cloning was used to insert the  
**130** gBlock of *TUBA1A* internally tagged with His6 (*TUBA1A*-His6) into the pCIG2 plasmid (shared  
**131** by Dr. Matthew Kennedy, University of Colorado) linearized with NruI and HindIII. *TUBA1A*-  
**132** His6 incorporation was confirmed by sequencing across the complete *TUBA1A* coding region.  
**133** The *TUBA1A*<sup>T349E</sup> (*TUBA1A*<sup>TE</sup>) polymerization incompetent, and *TUBA1A*<sup>E255A</sup> (*TUBA1A*<sup>EA</sup>)  
**134** highly polymer-stable  $\alpha$ -tubulin mutants were identified and described in prior publications [28-  
**135** 30]. The GFP-MACF43 vector was shared by Dr. Laura Anne Lowery (Boston College) and Dr.  
**136** Casper Hoogenraad (Utrecht University). Myr-TdTomato plasmid DNA was shared from Mark  
**137** Gutierrez and Dr. Santos Franco (University of Colorado).

**138** *Cell Culture and Nucleofection*

**139** Cos-7 cells (Thermo Fisher Scientific, Waltham, MA; ATCC<sup>®</sup> CRL-1651<sup>™</sup>) were cultured in a  
**140** 37°C humidified incubator with 5% CO<sub>2</sub> in DMEM (Gibco) supplemented with 10% fetal bovine  
**141** serum (Gibco), 1mM sodium pyruvate (Thermo), and penn/strep (1,000 IU/ 1,000 µg/mL;  
**142** Thermo). Cos-7 cells were transfected with 2.5µg of hexahistidine (His6) tagged *TUBA1A*  
**143** plasmid DNA using Lipofectamine 3000 (Invitrogen). For Cos-7 proteasome inhibition assays,  
**144** 5µm Lactacystin A [31, 32] was added to normal culture medium for 24 hours, the day following  
**145** transfection with *TUBA1A*-His6 constructs. Dissociated neurons were cultured from male and  
**146** female P0-P2 mouse or rat cortices. Brains were removed and placed into HBSS (Life  
**147** Technologies) supplemented with 1M HEPES (Life Technologies) and 1mM kynurenic acid  
**148** (Tocris Bioscience, Bristol, UK). Meninges were removed and cortices were dissected and cut  
**149** into approximately 1mm pieces. Cortical pieces were triturated to a single-cell suspension using  
**150** glass Pasteur pipettes. Cortical neurons were plated onto 35mm Poly-D-Lysine coated glass-  
**151** bottom culture dishes at a density of 350,000 cells (Willco Wells, HBSt-3522). For nucleofected  
**152** mouse and rat neurons, 4 µg of plasmid DNA was introduced to 4x10<sup>6</sup> neurons using an  
**153** AMAXA nucleofection kit (VPG-1001, VPG-1003; Lonza). AMAXA-nucleofected cells were  
**154** plated in 35mm glass bottom imaging dishes. Neurons were maintained in a 37°C humidified  
**155** incubator with 5% CO<sub>2</sub> in phenol-free Neurobasal-A medium (Life Technologies) supplemented  
**156** with B-27 (Thermo Fisher Scientific, Waltham, MA), Penn/strep (Thermo), GlutaMax (Thermo),  
**157** 5ng/mL β-FGF (Gibco), and Sodium Pyruvate (Thermo).

**158** *RNA isolation + RTPCR*

**159** RNA was isolated from Cos-7 cells, 48-hours post-transfection using TRIzol Reagent (Thermo;  
**160** 15596026). RNA concentration and purity were determined using a spectrophotometer, then  
**161** cDNA was synthesized using the RT2 First Strand Kit (Qiagen, Hilden, Germany; 330401).

**162** qRT-PCR reactions were prepared with SYBR Green RT-PCR Master mix (Thermo; S9194) and  
**163** run with a CFX Connect Real-Time System (Bio-Rad). Samples were run in triplicate, results  
**164** were analyzed in Excel. All qPCR data presented in this manuscript was normalized to  
**165** expression of GFP, which was present on the same plasmid as *TUBA1A*-His6 constructs. Wild-  
**166** type *TUBA1A* mRNA quantity was set to = 1 and *TUBA1A*<sup>ND</sup> relative mRNA quantity was  
**167** presented relative to wild-type. For all qRT-PCR experiments 3 biological replicates were used  
**168** per genotype.

### **169** *Neuron Immunocytochemistry*

**170** DIV 3 primary cortical neurons were washed with PBS and fixed with a fixation solution of 4%  
**171** PFA and 0.2% glutaraldehyde in PBS for 15 minutes at room temperature. For tubulin  
**172** extraction, cells were washed with PBS followed by PHEM buffer, then soluble tubulin dimers  
**173** were extracted using 0.1% triton with 10 $\mu$ M taxol and 0.1% DMSO in PHEM buffer. Extracted  
**174** cells were fixed with 2% PFA and 0.05% glutaraldehyde in PBS for 10 minutes, washed with  
**175** PBS and then reduced in 0.1% NaBH<sub>4</sub> in PBS for 7 minutes at room temperature. Cells were  
**176** then washed with PBS and blocked in 3% BSA and 0.2% Triton in PBS for 20 minutes at room  
**177** temperature, with agitation. Immunostaining was performed using primary antibodies directed  
**178** against: 6X-Histidine (Invitrogen, 4A12E4 37-2900; 1:500), total  $\alpha$ -tubulin (Sigma, DM1A  
**179** T6199; 1:5,000), Acetylated Tubulin (Sigma, T7451; 1:1,000), Tyrosinated Tubulin (Chemicon,  
**180** MAB1864; 1:1,000), Map1b (Santa Cruz Biotech, sc-135978; 1:500), Map2 (Novus Biologicals,  
**181** NB300-213; 1:2,000). Primary antibodies were diluted in blocking buffer and incubated  
**182** overnight at 4°C in a humidified chamber. After primary antibody staining, cells were washed  
**183** three times with PBS. Fluorescently-conjugated secondary antibodies were diluted 1:500 in  
**184** blocking buffer and incubated for 2 hours at room temperature, protected from light. Secondary



**185** antibodies were from Life Technologies (Carlsbad, CA) all used at 1:500. Alexa Fluor 568-  
**186** conjugated Phalloidin (Thermo, A12380; 1:20) was added during secondary antibody incubation  
**187** for labeling of filamentous actin. Tissues or cells of interest were mounted onto glass microscope  
**188** slides and sealed with glass coverslips and aqueous mounting media containing DAPI (Vector  
**189** Laboratories, #H-1200) and imaged on a Zeiss 780 or 880 confocal microscope with a 40X or  
**190** 63X oil objective.

### **191** *Microtubule Dynamics and Neuron Growth Rates*

**192** Primary neurons from wild-type and *Tuba1a*<sup>ND/+</sup> neonatal mouse cortices were cultured as  
**193** described above. Prior to plating, mouse cortical neurons were nucleofected with 4 $\mu$ g each of  
**194** GFP-MACF43 and Myr-TdTomato plasmid DNA. Following 1 day in culture, neurons were  
**195** transferred to a 37°C imaging chamber and time-lapse images of GFP-MACF43 comets and  
**196** Myr-TdTomato membrane label were acquired using a Zeiss 780 confocal microscope with 40X  
**197** oil objective. Following acquisition of baseline images, images were acquired every 2 seconds  
**198** for 2 minutes. A total of four time-lapse videos were acquired per neuron, with a 10-minute  
**199** waiting period in between imaging sessions. Data from all four GFP-MACF43 time points were  
**200** pooled by cell to generate a cell average and then grouped by genotype for further analysis.  
**201** Membrane-bound Myr-TdTomato images were acquired at the beginning and end of the imaging  
**202** period and were used to track neuronal growth. Kymographs of GFP-MACF43 comets in single  
**203** neurites were generated from GFP-MACF43 videos in ImageJ/FIJI (National Institutes of  
**204** Health) and were used to assess microtubule polymerization velocity, along with the duration  
**205** and distance of individual plus-end polymerization events. In brief, polymerization velocity was  
**206** determined by measuring the change in position ( $X_2 - X_1$ ;  $\mu$ m) divided by the change in time ( $Y_2 -$   
**207**  $Y_1$ ; min) for each GFP-MACF43 comet, duration assessed the total time ( $Y_2 - Y_1$ ) each GFP-

**208** MACF43 comet spent moving in seconds, and distance assessed the total distance ( $X_2 - X_1$ )  
**209** covered by each polymerization event in  $\mu\text{m}$ .

**210** *Western Blotting*

**211** Protein was isolated from brains of P0-P2 mice by dounce homogenization and ultra-  
**212** centrifugation. Tubulin-enriched protein fractions with MAPs were isolated according to a  
**213** previously established protocol [33]. Cos-7 cell protein was extracted using a Tris-Triton lysis  
**214** buffer with protease inhibitor cocktail (Sigma). Protein concentrations were assessed using a  
**215** BCA assay (Thermo), and relative concentration was determined using a Synergy H1 microplate  
**216** reader (BioTek Instruments, Winooski, VT).  $5\mu\text{g}$  of either whole brain lysate or tubulin-enriched  
**217** protein fraction was loaded per lane and run on 4-20% Mini-Protean TGX Stain-Free precast  
**218** gels (4568093; Bio-Rad Laboratories, Hercules, CA) at 150mV for 1hr. Prior to protein transfer,  
**219** Stain-Free gels were activated with UV light for 1 minute and imaged for total protein on gel  
**220** using a ChemiDoc MP imager (Bio-Rad). Proteins were transferred to PVDF blotting  
**221** membranes (Bio-Rad) in standard 25mM Tris-base, 192mM glycine, 15% methanol transfer  
**222** buffer, or transfer buffer optimized for high molecular-weight proteins ( $>200\text{kDa}$ ) by the  
**223** addition of 0.025% SDS. Blots were transferred at  $4^\circ\text{C}$  and 75V for either 1 hour for standard  
**224** molecular-weight proteins, or 3 hours for high molecular-weight proteins. Immediately following  
**225** transfer, PVDF membranes were rinsed in TBST and imaged to quantify the total protein on blot  
**226** using UV-activated Stain-Free blots. Gels were also imaged post-transfer to assess transfer  
**227** efficiency for each blot. Membranes were blocked in Tris-buffered Saline containing 0.1%  
**228** Tween-20 (TBST) with 5% BSA for 1 hour and incubated in primary antibody diluted in TBST  
**229** containing 1% BSA overnight at  $4^\circ\text{C}$ . Primary antibodies were: mouse anti 6X-Histidine  
**230** (Invitrogen, 4A12E4; 1:500), chicken anti-GFP (Invitrogen, A10262; 1:1,000), and mouse anti-

**231** Map1b (Santa Cruz, sc-135978; 1:500). Blots were incubated in HRP-conjugated Goat-anti-  
**232** mouse (1:5,000; Santa Cruz) secondary antibody diluted in TBST containing 0.5% BSA with  
**233** streptavidin-HRP (Bio-Rad, 1:10,000) for 1 hour at room temperature. Blots were developed in  
**234** ECL solution for 5 minutes at room temperature (Bio-Rad) and imaged.

**235** *Experimental design and statistical analyses.*

**236** Band volume of all Western blots was analyzed using Image Lab software (Bio-Rad).  
**237** Fluorescence intensity measurements, area and morphological assessment, kymograph  
**238** generation, and quantification of EM images was performed using ImageJ/FIJI software (NIH)  
**239** and Excel (Microsoft). Statistical analyses were performed, and graphs were created using Prism  
**240** version 8.0 (GraphPad). Most graphs display all data points to accurately represent the variability  
**241** in each dataset, except in cases where such presentation obscured visibility. For all statistical  
**242** analyses, statistical significance was considered to be  $p < 0.05$ . Statistical analyses used in each  
**243** experiment are indicated in their respective figure legends. For all graphs mean  $\pm$  SEM was  
**244** reported unless otherwise noted. Normality of each dataset was assessed using a Shapiro-Wilk  
**245** test. In datasets with two groups, parametric data was analyzed using a Student's t-test, while  
**246** non-parametric data was assessed by Mann-Whitney *U* analysis of medians. Multiple groups  
**247** were compared by one-way or two-way ANOVA and analyzed *post hoc* by either a Bonferroni  
**248** or Kruskal-Wallis test for parametric and non-parametric data, respectively.

**249**

## **250** Results

### **251** *Tuba1a* is required for formation of midline commissural structures

**252** *TUBA1A* is a major component of developing neuronal microtubules, and is critical for  
**253** proper brain development [20]. Human *TUBA1A*-tubulinopathy patients and homozygous

**254** *Tubala* mutant mouse models both exhibit severe brain malformations. *Tubala*<sup>ND/+</sup> heterozygous  
**255** mutant mice undergo normal cortical migration, display comparable brain weight to wild-type  
**256** littermates at birth, and survive to adulthood [22, 24]. However, *Tubala*<sup>ND/+</sup> brains exhibit  
**257** agenesis of the corpus callosum and abnormal formation of the anterior and hippocampal  
**258** commissures (Fig. 1A). In wild-type mice, nascent callosal ‘pioneer’ axons extend through  
**259** midline at E15.5, and early ‘follower’ axons begin extending at E17 in mice [34]. Evidence of  
**260** abnormal callosal projections were apparent as early as P0 in *Tubala*<sup>ND/+</sup> brains, as seen by the  
**261** early formation of aberrant axon bundles adjacent to the callosum, known as Probst bundles (Fig.  
**262** 1A)[35]. In addition to agenesis of the corpus callosum at midline, lateral regions of adult  
**263** *Tubala*<sup>ND/+</sup> corpus callosum were found to be significantly thinner than wild-type (Fig. 1B).  
**264** Similarly, adult *Tubala*<sup>ND/+</sup> anterior commissures are smaller than that of wild-type littermates  
**265** (Fig. 1C). In wild-type mice, corpus callosum thickness and anterior commissure area both  
**266** increased significantly between P0 and adulthood; however, normal postnatal expansion of these  
**267** tracts was not evident in *Tubala*<sup>ND/+</sup> mice (Fig. 1B, C). *Tubala*<sup>ND/+</sup> axons fail to organize into  
**268** typical midline commissural structures, indicating that half of the normal complement of *Tubala*  
**269** during brain development is not sufficient for commissural axon guidance.

270

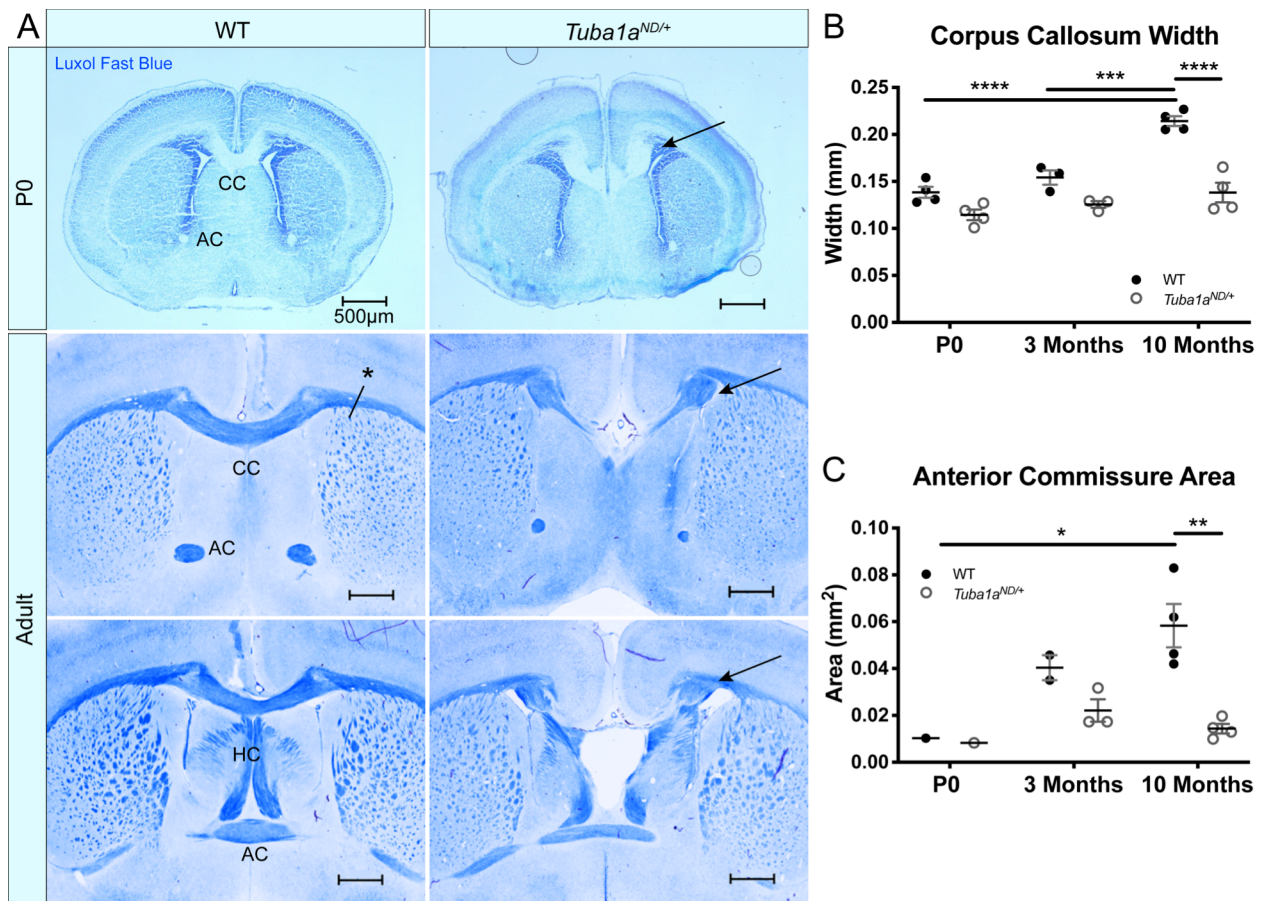

271

272

Examination of sagittal brain sections taken directly at midline revealed dramatic

273

disorganization of corpus callosum axons in *Tubal1*<sup>ND/+</sup> brains (Fig. 2A). Compared to wild-

274

type, *Tubal1*<sup>ND/+</sup> midline commissural axons were largely absent, and the existing axons failed to

275

organize into a tract with uniform orientation (Fig. 2A). Despite dramatic differences between

276

wild-type and *Tubal1*<sup>ND/+</sup> callosal axon organization, *Tubal1*<sup>ND/+</sup> axons were highly colocalized

277

with immunolabeled myelin sheaths (Fig. 2A). To further assess the impact of *Tubal1*<sup>ND/+</sup>

**278** substitution on callosal axon morphology and myelination, we performed electron microscopy  
**279** (EM) in both wild-type and *Tuba1a*<sup>ND/+</sup> corpus callosi. Due to the scarcity of axons present  
**280** directly at midline in the *Tuba1a*<sup>ND/+</sup> corpus callosum, we sampled a region of corpus callosum  
**281** 2mm lateral to midline for both wild-type and *Tuba1a*<sup>ND/+</sup> animals (Fig. 2B). EM images  
**282** revealed a striking difference in axon density between wild-type and *Tuba1a*<sup>ND/+</sup> corpus callosi  
**283** (Fig. 2B, D; p=0.03). Myelin thickness, measured by G-ratio, was similar between wild-type and  
**284** *Tuba1a*<sup>ND/+</sup> brains (Fig. 2C; p=0.34), as was axon diameter (Fig. 2E; p=0.14). There was a trend  
**285** towards decreased myelination in *Tuba1a*<sup>ND/+</sup> animals (p=0.07), but this difference was not  
**286** statistically significant (Fig. 2F). These data provide evidence that *Tuba1a*<sup>ND/+</sup> callosal axons do  
**287** not correctly organize to form a commissure. Previously published data indicated that reduced  
**288** developmental Tuba1a function is tolerable for cortical neuron migration [22]; however, our  
**289** results indicate that reduced Tuba1a is not sufficient to support axon pathfinding.

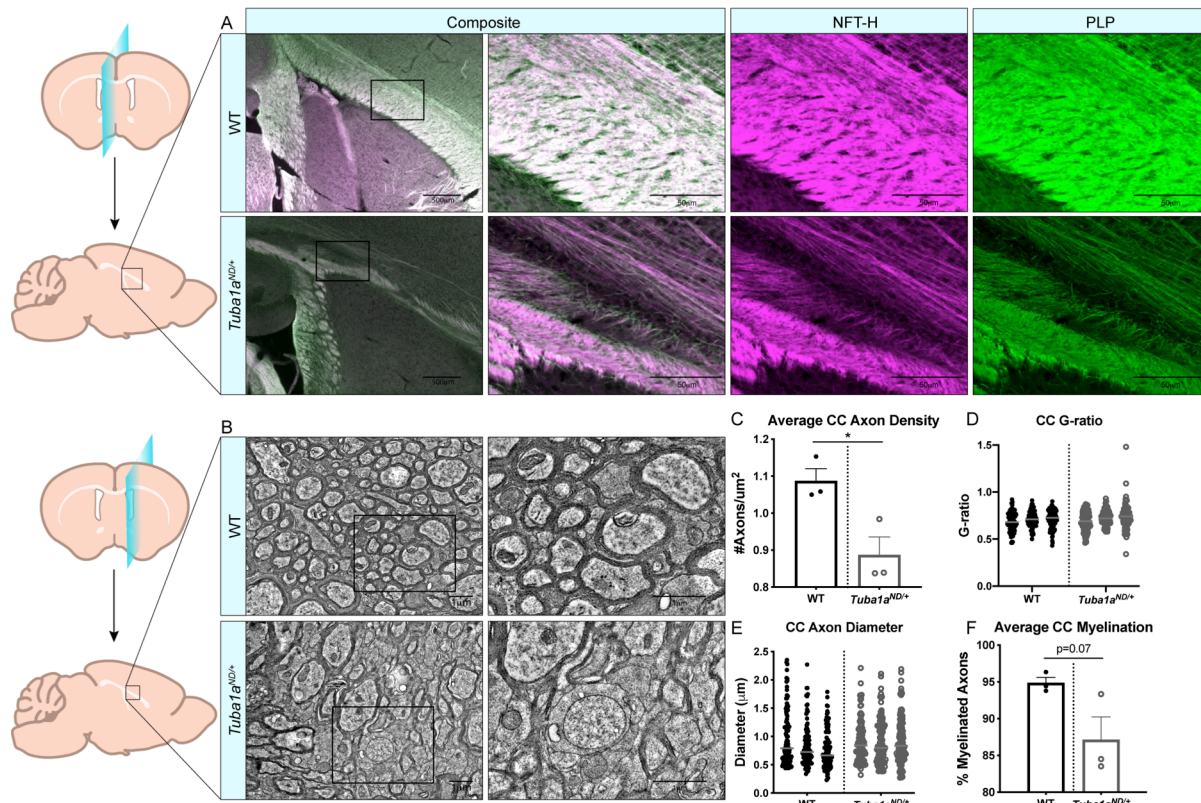

290

291 ***TUBA1A*<sup>ND</sup>  $\alpha$ -tubulin does not incorporate into neuronal microtubules**

292 Reduced developmental *Tuba1a* is not adequate to support long-distance axon targeting,

293 but the molecular and cellular mechanisms by which *Tuba1a* alters neuronal microtubule

294 function are unknown. The *Tubal1*<sup>ND</sup> allele was previously demonstrated to cause partial loss of

**295** microtubule function in yeast and mice [22, 24]. However, the mechanism by which *Tuba1a*<sup>ND</sup>  
**296** substitution leads to loss-of-function (LOF) is unclear. The neuronal microtubule network is  
**297** complex, containing many different tubulin isotype proteins, PTMs, and MAPs decorating the  
**298** lattice, all of which can modify functional microtubule properties. Further, the high degree of  
**299** sequence similarity between  $\alpha$ -tubulin isoforms has precluded study of individual tubulin  
**300** isoforms at the protein level *in vivo*. No  $\alpha$ -tubulin isotype or species-specific antibodies exist for  
**301** TUBA1A, and prior attempts to tag TUBA1A neuronal microtubules with N- or C-terminal  
**302** fusion proteins have had detrimental effects on protein function [36]. These challenges have  
**303** made the direct visualization of specific tubulin isoforms or mutant tubulin proteins in neurons  
**304** historically difficult. Thus, the ways in which TUBA1A specifically contributes to neuronal  
**305** microtubule protein function have been difficult to ascertain. To address the need for better tools  
**306** to study TUBA1A protein, we generated a functional hexahistidine (His6)-tagged TUBA1A  
**307** construct based on a previously identified internal loop in the  $\alpha$ -tubulin protein for *in vivo*  
**308** visualization and manipulation of microtubules [26] (Fig. 3A). We inserted a His6 tag into an  
**309** internal loop of TUBA1A between residues I42 and G43. This region of  $\alpha$ -tubulin was  
**310** previously shown to tolerate addition of amino acids without disrupting tubulin function [26],  
**311** and previous groups added a His6 tag in this loop to affinity purify tubulin subunits for  
**312** reconstituted systems [25, 27]. However, to our knowledge this internal His6 tag on  $\alpha$ -tubulin  
**313** has never been used for immunohistochemical assays to visualize the microtubule network *in*  
**314** *in vivo*. Ectopically expressed wild-type *TUBA1A*-His6 is incorporated into Cos-7 cell microtubules  
**315** (Fig. 3B). Compared to traditional immunolabeling of cellular microtubules (DM1A), *TUBA1A*-  
**316** His6 provides excellent labeling of microtubule polymers (Fig. 3B).



317

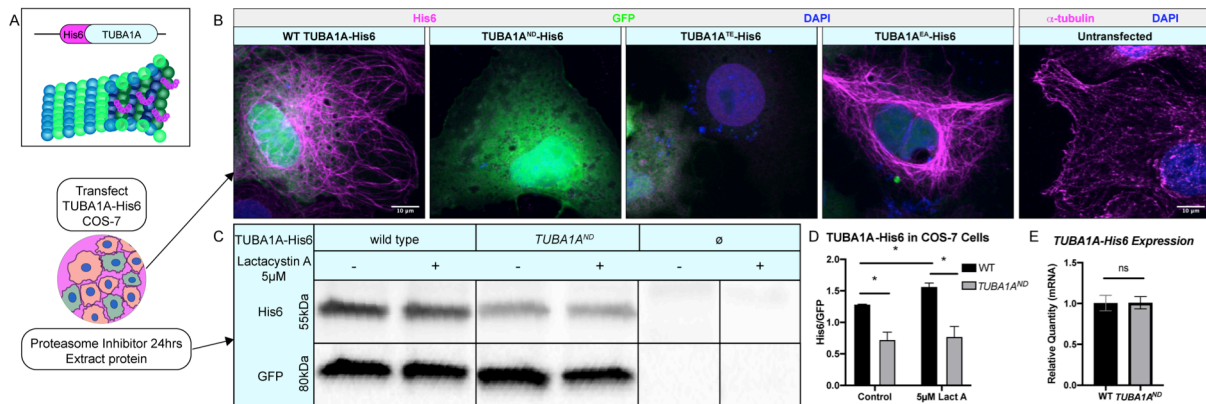

318

319 His6-tagged mutant *TUBA1A* can be ectopically expressed in cells to evaluate the abundance  
 320 and polymerization capability of mutant *TUBA1A* proteins. We ectopically expressed three  
 321 *TUBA1A* variants in Cos-7 cells: *TUBA1A*<sup>ND</sup>, the mutation analogous to the *Tuba1a*<sup>ND</sup> mice;  
 322 *TUBA1A*<sup>T349E</sup> (*TUBA1A*<sup>TE</sup>) an α-tubulin mutation shown to prevent polymerization in yeast [30];  
 323 and *TUBA1A*<sup>E255A</sup> (*TUBA1A*<sup>EA</sup>) an α-tubulin mutation which inhibits depolymerization and thus  
 324 becomes locked in a polymer-bound state [28, 29](Fig. 3B). As predicted, *TUBA1A*<sup>TE</sup>-His6  
 325 protein was not highly detected in Cos-7 cell microtubule polymers, while *TUBA1A*<sup>EA</sup>-His6  
 326 protein was abundantly incorporated into cellular microtubules (Fig. 3B). In contrast to wild-  
 327 type, but similar to the polymerization-incompetent *TUBA1A*<sup>TE</sup>-His6 protein, ectopic  
 328 *TUBA1A*<sup>ND</sup>-His6 protein was not detected in Cos-7 cells (Fig. 3B). Western blotting of lysates

**329** from Cos-7 cells, 48-hours post-transfection revealed that *TUBA1A<sup>ND</sup>*-His6 protein was  
**330** significantly reduced compared to wild-type *TUBA1A*-His6 (Fig. 3C, D; p=0.04), despite similar  
**331** *TUBA1A* mRNA levels between wild-type and *TUBA1A<sup>ND</sup>* transfected Cos-7 cells (Fig. 3E;  
**332** p=0.97). To evaluate if *TUBA1A<sup>ND</sup>* mutant protein is targeted for proteasomal degradation, we  
**333** treated *TUBA1A*-His6 transfected Cos-7 cells with 5 $\mu$ M proteasome inhibitor, Lactacystin A  
**334** (LactA [31, 32]), for 24-hours and probed for His6 abundance by western blot (Fig. 3C).  
**335** Treatment with LactA significantly increased wild-type *TUBA1A*-His6 protein compared to  
**336** control-treated cells, but had no effect on *TUBA1A<sup>ND</sup>*-His6 protein abundance (Fig. 3D; p=0.83).  
**337** These results indicate that *TUBA1A<sup>ND</sup>* mutant protein is likely not targeted for degradation by the  
**338** proteasome, but may reduce cellular TUBA1A by other mechanisms.

**339** We next investigated if *TUBA1A<sup>ND</sup>* substitution impairs incorporation of TUBA1A  
**340** protein into neuronal microtubule polymers (Fig. 4). Wild-type rat cortical neurons were  
**341** nucleofected with *TUBA1A*-GFP, wild-type *TUBA1A*-His6, *TUBA1A<sup>ND</sup>*-His6 and *TUBA1A<sup>TE</sup>*-  
**342** His6 DNA at day *in vitro* 0 (DIV 0; Fig. 4A). Following 2-days in culture (DIV 2), cells were  
**343** fixed and a subset of neurons were permeabilized to remove soluble tubulin dimers (“tubulin  
**344** extraction”). Extraction of soluble tubulin leaves behind only polymer-bound tubulin, enabling  
**345** visualization of ectopic tubulin protein polymerization competence [37]. Neurons expressing  
**346** *TUBA1A*-GFP exhibited abundant GFP signal in intact cells, but tubulin extraction revealed that  
**347** GFP fusion impaired incorporation of TUBA1A into neuronal microtubule polymers (Fig. 4B).  
**348** In contrast, wild-type *TUBA1A*-His6 protein was highly present in both intact and tubulin  
**349** extracted neurons, demonstrating that His6-tagging does not impair polymerization ability of  
**350** TUBA1A in neurons

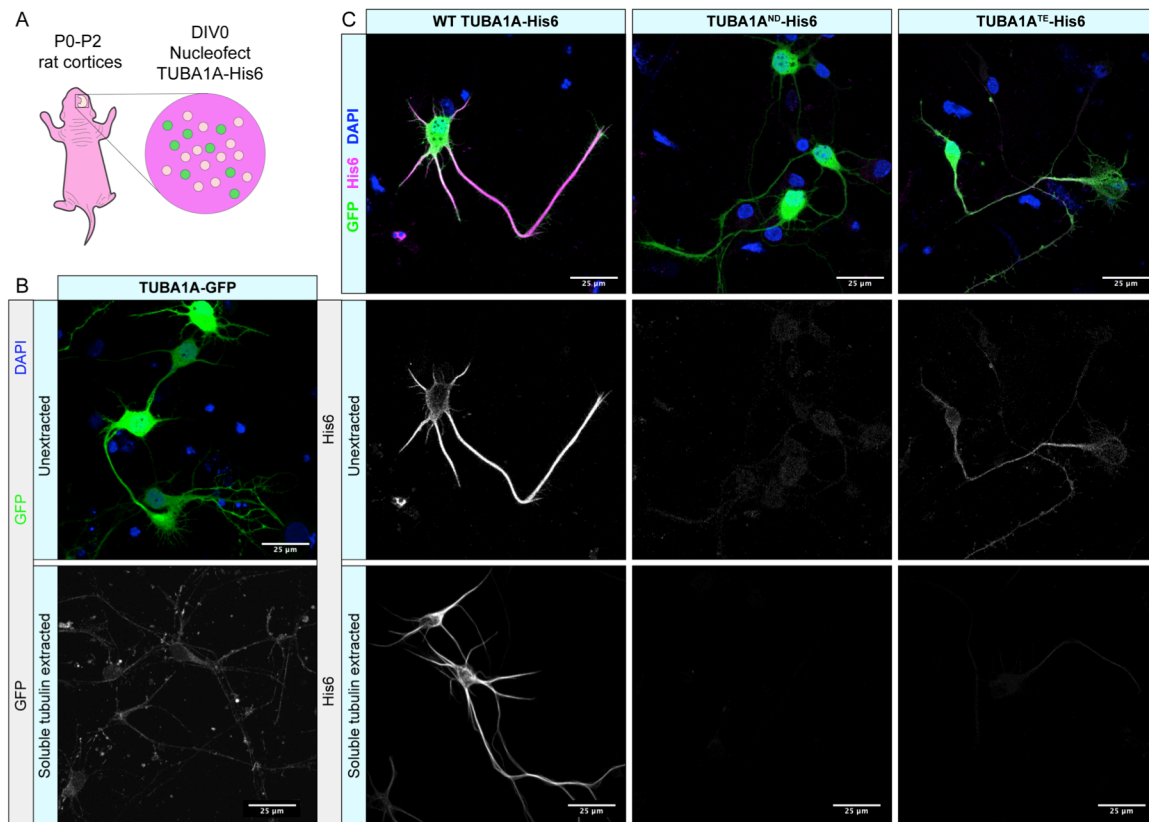

**Figure 4** *TUBA1A<sup>ND</sup> α-tubulin does not incorporate into neuronal microtubule polymers.*

**A.** Schematic of cortical neuron isolation and transfection. **B.** Cortical rat neurons at DIV 2 transfected with *TUBA1A*-GFP. Top panel shows neurons with intracellular environment intact (unextracted), containing soluble tubulin dimers and polymerized microtubules transfected to express a *TUBA1A*-GFP fusion protein. Bottom panel shows neurons with soluble tubulin dimers extracted, showing only GFP-labeled *TUBA1A* that is incorporated into microtubule polymer. **C.** Rat cortical neurons at DIV 2 transfected with wild-type (WT) *TUBA1A*-His6, *TUBA1A<sup>ND</sup>*-His6 LOF mutation, and *TUBA1A<sup>TE</sup>*-His6 polymerization-incompetent mutant as a negative control. Top panels show composite image containing membrane-bound GFP (green) for confirmation of transfection, α-His6 (Magenta) and DAPI (blue) immunolabeling. Middle panels show unextracted and bottom panels show tubulin extracted DIV 2 neurons (described in **B.**), labeled with α-His6 antibodies to visualize ectopic *TUBA1A*-His6 proteins. All images were taken at 63X magnification, scale bar is 25μm.

- 351**
- 352** (Fig. 4C). As predicted, polymerization incompetent *TUBA1A<sup>TE</sup>*-His6 mutant protein was
- 353** diffusely visible in intact neurons, but was absent from tubulin extracted neurons (Fig. 4C).
- 354** *TUBA1A<sup>ND</sup>*-His6 protein was detectable at very low levels in unextracted neurons, but was not
- 355** visible following tubulin extraction, indicating that *TUBA1A<sup>ND</sup>* impairs incorporation into
- 356** neuronal microtubules (Fig. 4C). These experiments illustrate that *TUBA1A<sup>ND</sup>* reduces
- 357** abundance of *TUBA1A* protein upstream of proteasomal degradation and prevents incorporation
- 358** of mutant *TUBA1A* into cellular microtubules.

359

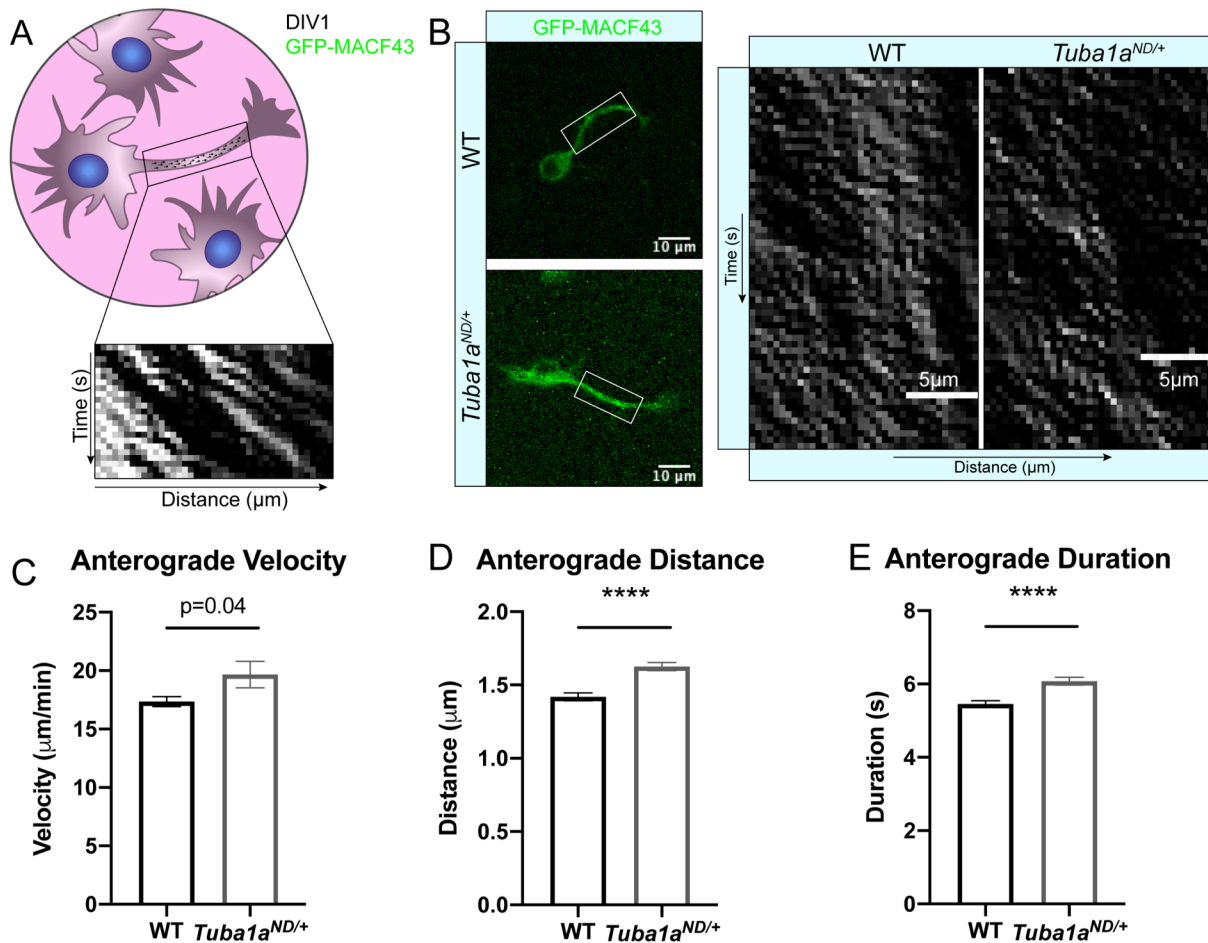

**Figure 5** Reduced *Tuba1a* alters neuronal microtubule polymerization at DIV 1.

**A.** Schematic of nucleofection and imaging experimental setup. Neurons were nucleofected with GFP-MACF43 plasmid DNA and imaged at DIV 1 for microtubule polymerization events in a neurite region of interest. **B.** Representative images showing GFP-MACF43 expressing wild-type (WT) and *Tuba1a<sup>ND/+</sup>* neurons at 40X magnification (left) and representative kymographs that were generated from GFP-MACF43 images (right). Scale bars are 10 $\mu\text{m}$  and 5 $\mu\text{m}$  on neuron images and kymographs, respectively. **C.** Bar graph representing the average polymerization velocity for anterograde microtubule polymerization events in WT and *Tuba1a<sup>ND/+</sup>* cortical neurons at DIV 1 (n=688 events; p=0.0008 by Mann-Whitney test). **D.** Bar graph representing polymerization distance in DIV 1 WT and *Tuba1a<sup>ND/+</sup>* cortical neurons (n=688 events, p<0.0001). **E.** Bar graph representing polymerization duration in DIV 1 WT and *Tuba1a<sup>ND/+</sup>* cortical neurons (n=688 events, p<0.0001). Bars represent the mean of each group and error bars represent SEM. Differences between groups were assessed by t test, unless otherwise noted.

360

### 361 Reduced *Tuba1a* alters microtubule dynamic properties in neurons

362 Dynamic instability is a defining feature of microtubule polymers that is heavily  
363 influenced by a number of factors to tune microtubule network function in cells [14]. MAP-  
364 binding, PTMs, and incorporation of different tubulin isoforms can all influence microtubule

**365** dynamics [38-41]. *TUBA1A<sup>ND</sup>* tubulin is less abundant than wild-type and does not incorporate  
**366** into neuronal microtubule polymers (Figs. 3-4). We next assessed microtubule dynamics in  
**367** developing *Tuba1a<sup>ND/+</sup>* neurons. Wild-type and *Tuba1a<sup>ND/+</sup>* cortical neurons were transfected  
**368** with GFP-MACF43, a fluorescently tagged protein containing the SxIP motif bound by  
**369** microtubule plus-end binding proteins (EBs), allowing for visualization of microtubule plus-end  
**370** polymerization in live cells (Fig. 5A)[42]. Kymograph plots generated from time-lapse GFP-  
**371** MACF43 images were analyzed for velocity, duration, and distance of GFP-MACF43  
**372** polymerization events (Fig. 5B). Previous analysis of *Tuba1a<sup>ND/+</sup>* GFP-MACF43 data revealed a  
**373** significant reduction in the number of microtubule plus-ends per micron of neurite, which is  
**374** evident in the example kymographs (Fig. 5B; [24]). Kymograph analysis showed that  
**375** *Tuba1a<sup>ND/+</sup>* microtubules had accelerated polymerization velocity ( $19.67 \pm 1.1 \mu\text{m}/\text{min}$ ) compared  
**376** to wild-type at DIV 1 ( $17.36 \pm 0.43 \mu\text{m}/\text{min}$ ; Fig. 5C; n=688 events per genotype; p=0.0008 by  
**377** Mann-Whitney test), consistent with prior data from *S. cerevisiae* [22]. Additionally, *Tuba1a<sup>ND/+</sup>*  
**378** polymerization events covered a larger distance (Fig. 5D; n=688 events, p<0.0001) and lasted a  
**379** longer amount of time (Fig. 5E; n=688 events, p<0.0001) than polymerization events in wild-  
**380** type neurons. The increased polymerization rates of *Tuba1a<sup>ND/+</sup>* neuronal microtubules was  
**381** surprising, but collectively with our previous results these data indicate that *Tuba1a<sup>ND</sup>* protein is  
**382** not functional, and that the diminished  $\alpha$ -tubulin pool leads to altered microtubule dynamics and  
**383** changes to microtubule organization in developing neurons.  
**384**

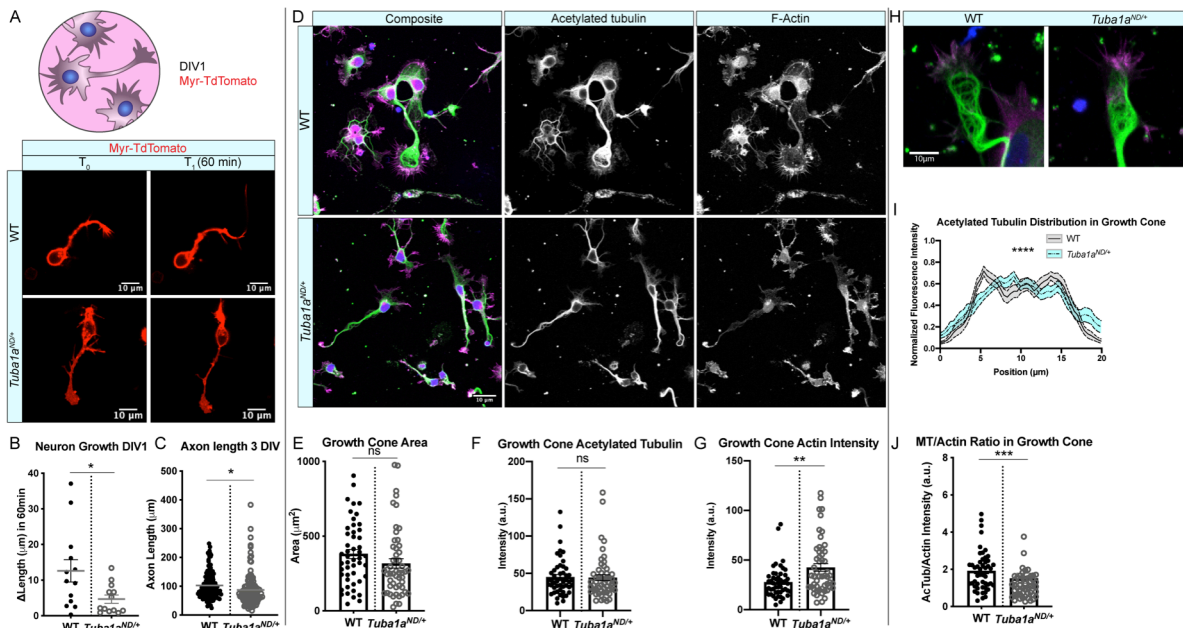

**Figure 6** *Tubal1*<sup>ND</sup> impairs neurite outgrowth and alters growth cone cytoskeleton in cortical neurons.

**A.** Schematic of experimental design and time-lapse images of membrane-labeled Myr-TdTomato neurons at DIV 1. Myr-TdTomato images were acquired 60 minutes apart to assess neuronal growth rate in wild-type (WT; top) and *Tubal1*<sup>ND/+</sup> (bottom) cortical neurons. **B.** Scatter plot of growth rates in live cortical neurons from WT and *Tubal1*<sup>ND/+</sup> mice at DIV 1. Data points represent individual neurons (N=3 mice, n=13 neurons; p=0.03 by Mann-Whitney test). **C.** Scatter plot of neurite length at DIV 3 in fixed WT and *Tubal1*<sup>ND/+</sup> primary cortical neurons. For each cell, the longest neurite, designated a putative ‘axon’, was measured from the cell soma to the distal neurite tip using an acetylated tubulin marker. Data points represent individual neurons (N=3 mice, n=124 neurons; p=0.02). **D.** Images of DIV 3 WT (top) and *Tubal1*<sup>ND/+</sup> (bottom) cortical neurons stained with antibodies directed against acetylated tubulin (green) and rhodamine phalloidin (F-actin, magenta). Composite images are shown (left) with single channel grayscale images for acetylated tubulin (middle) and F-actin (right). Scale bars are 10µm. **E.** Scatter plot of growth cone area at DIV 3 in WT and *Tubal1*<sup>ND/+</sup> cortical neurons. Data points represent individual growth cones (N=3 mice, n=52 growth cones; p=0.26). **F.** Scatter plot of acetylated tubulin intensity within the growth cone of WT and *Tubal1*<sup>ND/+</sup> cortical neurons at DIV 3. Data points represent individual growth cones (n=49 growth cones; p=0.89). **G.** F-actin intensity within growth cone of WT and *Tubal1*<sup>ND/+</sup> cortical neurons at DIV 3. Data points represent individual growth cones (N=3 mice, n=49 growth cones; p=0.0014). **H.** Representative images of WT and *Tubal1*<sup>ND/+</sup> cortical neuron growth cones showing distribution of acetylated tubulin (green) and F-actin (magenta). **I.** Line plot showing the average acetylated tubulin fluorescence intensity across a 20µm line scan through the central domain of the growth cone in DIV 3 WT and *Tubal1*<sup>ND/+</sup> neurons. Differences between WT and *Tubal1*<sup>ND/+</sup> growth cones were assessed by two-way ANOVA which showed a significant interaction between genotype and fluorescence intensity by position (n=20 growth cones; p<0.0001). **J.** Scatter plot representing the ratio of acetylated tubulin to F-actin intensity within the growth cones of DIV 3 WT and *Tubal1*<sup>ND/+</sup> cortical neurons. Data points represent individual growth cones (N=3 mice, n=49 growth cones; p=0.0003 by Mann-Whitney test). For all plots, lines represent mean and error bars report SEM. Differences between WT and *Tubal1*<sup>ND/+</sup> datasets were assessed by t test unless otherwise noted. \*n<0.05; \*\*n<0.01.

### 385 *Tubal1* is necessary for neurite extension and cytoskeletal organization in growth cone

386 To assess potential mechanisms by which reduced *Tubal1* prevents commissural neurons

387 from reaching their contralateral targets, we measured neurite growth rates in cultured primary

388 cortical neurons from P0 wild-type and *Tubal1*<sup>ND/+</sup> mice (Fig. 6A). We labeled primary wild-

389 type and *Tubal1*<sup>ND/+</sup> cortical neurons with a membrane-bound Myr-TdTomato to visualize

390 growth rates in live neurons (Fig. 6A). Analysis of membrane bound Myr-TdTomato images

391 taken one hour apart revealed that *Tubal1*<sup>ND/+</sup> neurons grew at a significantly slower rate than

392 wild-type neurons (Fig. 6B; N=3 mice, n=13 neurons; p=0.03 by Mann-Whitney test) with  
393 *Tuba1a*<sup>ND/+</sup> neurons growing an average of 4.67±1.15µm/hr compared to 12.60±3.12µm/hr in  
394 wild-type neurons. Additionally, measurements of the longest neurite, designated a putative  
395 ‘axon’, at DIV 3 revealed that *Tuba1a*<sup>ND/+</sup> neurites were significantly shorter than that of wild-  
396 type (Fig. 6C; N=3 mice, n=124 neurons; p=0.02). Together, these data show that developing  
397 neurons with reduced Tuba1a have shorter neurites and grow at a slower rate than wild-type.

398 To explore the precise mechanisms by which reduced Tuba1a contributes to slowed  
399 outgrowth in *Tuba1a*<sup>ND/+</sup> neurons, we assessed the abundance of acetylated microtubules and  
400 filamentous actin (F-actin) in developing growth cones of wild-type and *Tuba1a*<sup>ND/+</sup> cortical  
401 neurons at DIV 3 (Fig. 6D). The growth cone is a dynamic developmental structure that uses the  
402 coordinated action of the actin and microtubule cytoskeleton to drive neuronal outgrowth in  
403 response to internal and external cues [43, 44]. Growth cone area was not changed in *Tuba1a*<sup>ND/+</sup>  
404 neurons (317.4±31.3µm<sup>2</sup>) compared to wild-type (380.9±30.4µm<sup>2</sup>; Fig. 6E; n=49 growth cones;  
405 p=0.15). We examined the amount of acetylated tubulin, a PTM associated with stable  
406 microtubules (Fig. 6F) and found there to be no difference in the overall fluorescence intensity of  
407 acetylated tubulin in *Tuba1a*<sup>ND/+</sup> neurons compared to wild-type (n=49 growth cones; p=0.89). In  
408 contrast, we observed a significant increase in F-actin intensity within the growth cones of  
409 *Tuba1a*<sup>ND/+</sup> neurons compared to wild-type (Fig. 6G; n=49 growth cones; p=0.0014). Neuronal  
410 microtubules splay out in the central, actin-dominated regions of the growth cone, but are  
411 bundled towards the peripheral domains of the growth cone [45]. To assess the degree of growth  
412 cone microtubule bundling, we next performed line scans across the widest point of DIV 3  
413 growth cones ≥10µm (Fig. 6H). Line scans of acetylated tubulin through the growth cone  
414 revealed differences in microtubule organization between wild-type and *Tuba1a*<sup>ND/+</sup> neurons

415 (Fig. 6I; n=39 growth cones; p<0.0001 between genotypes by two-way ANOVA). Specifically,  
 416 we observed peaks in fluorescence, indicating bundled microtubules, at the edges of the growth  
 417 cone in wild-type neurons, where acetylated tubulin was more diffuse and lacked obvious  
 418 organization in *Tuba1a*<sup>ND/+</sup> growth cones (Fig. 6I). Intriguingly, the ratio of acetylated  
 419 microtubules to F-actin in the growth cone was significantly reduced in *Tuba1a*<sup>ND/+</sup> neurons

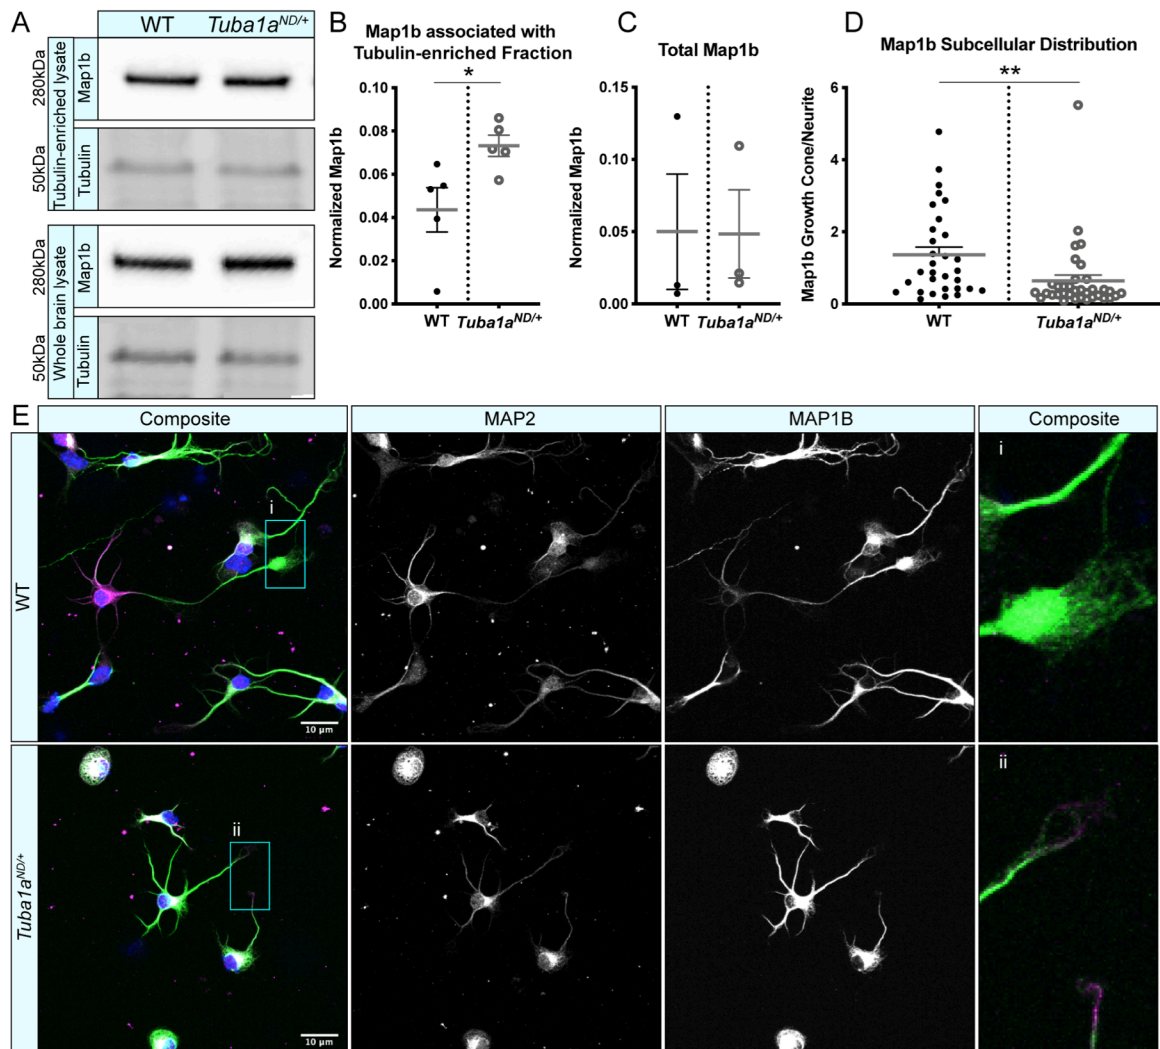

**Figure 7** *Tuba1a*<sup>ND</sup> neurons do not correctly localize Map1b to the developing growth cone.

**A.** Western blots showing Map1b protein associate with a tubulin-enriched fraction from brain (top panel) and total Map1b protein in whole brain lysate (bottom panel) from wild-type (WT) and *Tuba1a*<sup>ND/+</sup> mice. Due to the amount of protein that was loaded for Map1b western blots, antibody-stained bands for  $\alpha$ -tubulin were oversaturated and could not be quantified, thus Map1b was normalized to the 50kDa band (presumed to be primarily tubulin) on a UV-activated stain-free blot. **B.** Scatter plot quantifying Map1b associated with the tubulin-enriched brain lysate, normalized to the 50kDa presumed tubulin band using stain-free western blotting. p=0.03 **C.** Scatter plot representing total Map1b protein in brain lysate by western blot, normalized to the total protein on a stain-free blot. p=0.98 **D.** Scatter plot showing the subcellular distribution of Map1b protein in WT and *Tuba1a*<sup>ND/+</sup> cortical neurons at DIV 3. Data are represented as Map1b fluorescent signal in growth cone region divided by a region proximal to the cell body. p=0.009. **E.** Representative images showing altered subcellular distribution of Map1b in *Tuba1a*<sup>ND/+</sup> (bottom) cortical neurons compared to WT (top) at DIV 3. Composite and individual channel grayscale images of MAP2 and Map1b immunocytochemistry are shown, *i* and *ii* indicate enlarged regions shown in insets. Scale bars are 10 $\mu$ m. Differences between groups were evaluated by t test. \* n<0.05; \*\* n<0.01



420 compared to wild-type, indicating changes to the overall growth cone cytoskeletal environment  
421 in *Tuba1a*<sup>ND/+</sup> neurons (Fig. 6J; n=49 growth cones per genotype; p=0.0003). Together, these  
422 data indicate that neurite growth rate is particularly sensitive to the amount of Tuba1a tubulin  
423 available, and impaired Tuba1a function leads to abnormal actin and microtubule architecture in  
424 the developing growth cone.

425

#### 426 ***Tuba1a*<sup>ND</sup> neurons fail to localize critical developmental proteins to growth cone**

427 MAPs play a crucial role in regulating neuronal microtubule function to support proper  
428 neurodevelopment. Microtubule-associated protein 1b (Map1b) promotes axon extension and is  
429 required for formation of the corpus callosum in mice [46, 47]. There was no significant deficit  
430 in the association of Map1b with microtubules from *Tuba1a*<sup>ND/+</sup> brain lysates compared to wild-  
431 type; in fact, *Tuba1a*<sup>ND/+</sup> lysates bound slightly more Map1b than wild-type (Fig. 7A, B; p=0.03).  
432 Western blot analysis of whole brain lysates from wild-type and *Tuba1a*<sup>ND/+</sup> mouse brains  
433 showed no difference in the total amount of Map1b protein (Fig. 7A,C; p=0.98). These data  
434 indicate *Tuba1a*<sup>ND</sup> does not impair Map1b's interaction with neuronal microtubules. In  
435 developing wild-type neurons, Map1b localizes strongly to the growth cone to promote axon  
436 growth and facilitate microtubule response to guidance cues [47-51]. *Tuba1a*<sup>ND/+</sup> neurons  
437 contained Map1b protein, but exhibited very little Map1b fluorescence in the growth cone  
438 compared to wild-type neurons (Fig. 7D, E; n=31 growth cones; p=0.009). These data provide  
439 evidence that while the abundance of Map1b protein is unchanged by *Tuba1a*<sup>ND</sup>, reduced  
440 Tuba1a does not allow for correct subcellular localization of Map1b to the growth cone. Failure  
441 of *Tuba1a*<sup>ND/+</sup> neurons to localize Map1b to the developing growth cone provides a putative

442 mechanism by which developing axons may fail to respond to critical guidance cues, leading to  
 443 the commissural deficits observed in *Tuba1a*<sup>ND/+</sup> mice.  
 444

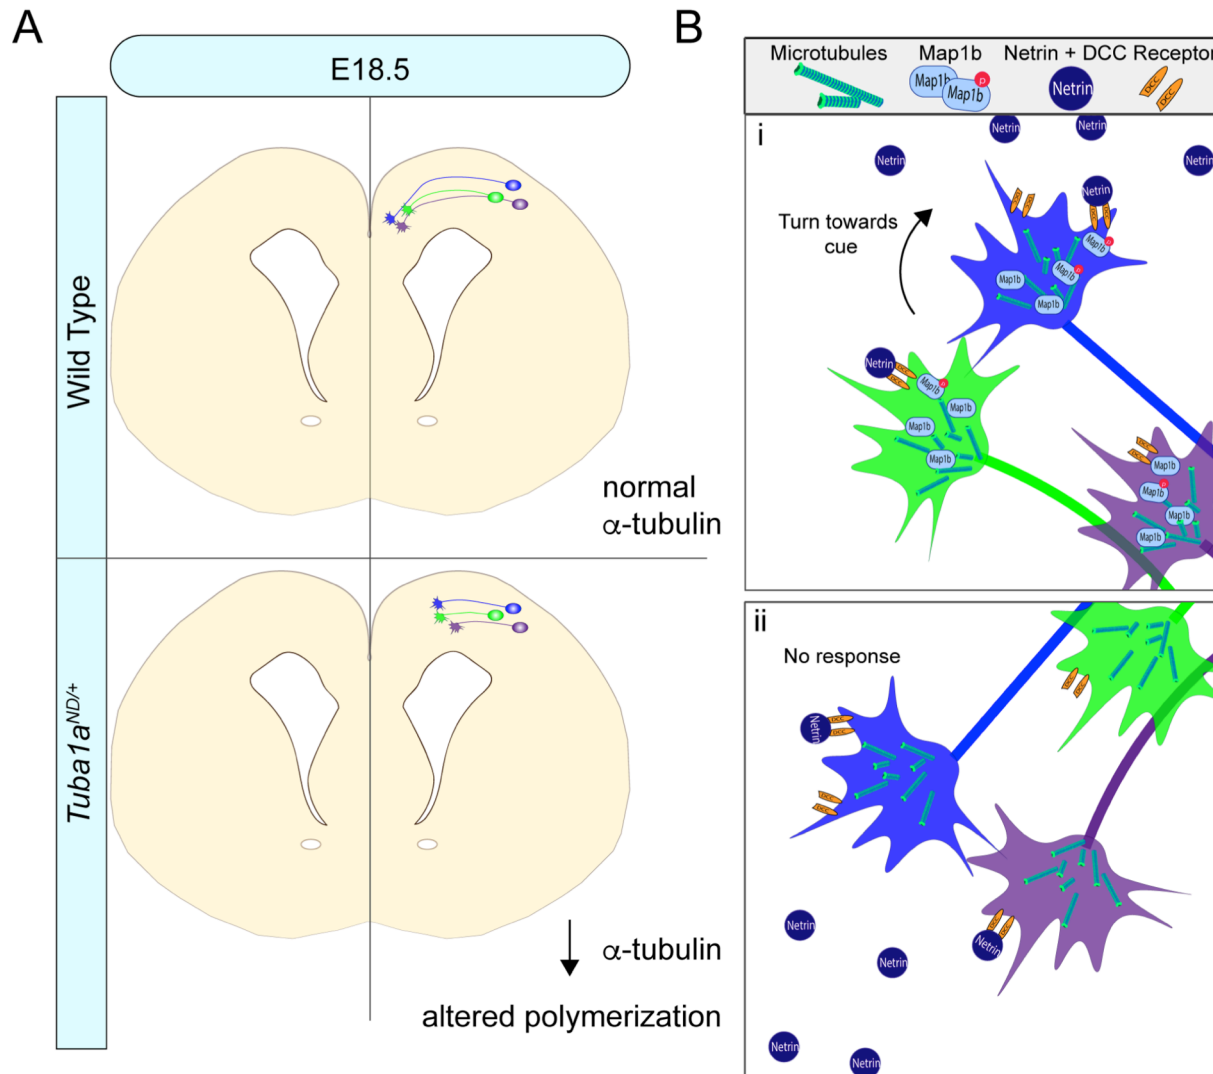

**Figure 8** Mechanisms of *Tuba1a*-induced axonal pathfinding deficits.  
**A.** Schematic illustrating how reduced *Tuba1a* may impair ability of *Tuba1a*<sup>ND/+</sup> axons to reach key signaling points at the correct developmental time to support proper brain formation. Wild-type axons (WT; top) reaching the midline crossing point of corpus callosum at embryonic day (E) 18.5 are compared to the potentially stunted axonal growth in *Tuba1a*<sup>ND/+</sup> brains (bottom). The reduced density of microtubules and altered polymerization dynamics likely contribute to slower growth of developing *Tuba1a*<sup>ND/+</sup> commissural neurons. **B.** Schematics illustrating potential molecular mechanisms by which *Tuba1a* supports navigating axons. **i.** Inset from (A), showing WT growth cones navigating through midline corpus callosum. WT growth cones are rich with Map1b, which binds growth cone microtubules to guide cellular response to guidance molecules like Netrin. **ii.** Inset from (A) showing *Tuba1a*<sup>ND/+</sup> growth cones, which fail to localize Map1b and may be rendered unable to mount a cytoskeletal response to extracellular cues.

## 445 **Multi-faceted functions of TUBA1A during neurodevelopment**

446 Our results support two potential models by which TUBA1A regulates neuronal  
447 microtubules to promote commissural axon pathfinding. Using our *TUBA1A*-His6 tool, we  
448 illustrated that the *TUBA1A*<sup>ND</sup> allele diminishes TUBA1A protein abundance in cells (Fig. 3).  
449 Here, we demonstrate that diminished Tuba1a alters microtubule dynamics and impairs neurite  
450 outgrowth *in vitro* (Figs. 5-6). Thus, reduced Tuba1a could render neurons incapable of  
451 supplying the microtubule bulk needed to drive axon outgrowth forward at a specific rate (Fig.  
452 8A). The timing of neurodevelopment is precisely regulated, and neurons which fail to reach  
453 targets at the correct time can miss crucial developmental signaling events. We additionally show  
454 that neurons with reduced Tuba1a fail to localize a critical developmental MAP, Map1b, to the  
455 growth cone (Fig. 7). Interactions between MAPs and microtubules play a major role in adapting  
456 microtubule function in response to a changing intra- and extra-cellular developmental  
457 environment [46, 51, 52]. Therefore, neurons with reduced Tuba1a may be rendered unable to  
458 respond to extracellular guidance cues, such as Netrin1, due to failed sub-cellular localization of  
459 MAPs and other critical cargoes (Fig. 8B). Our evidence supports a multi-faceted role for  
460 TUBA1A during neurodevelopment, where it tunes microtubule dynamics and density to fuel  
461 growth and also provides stable tracks for rapid intracellular transport.

462

## 463 Discussion

### 464 **Studying $\alpha$ -tubulin isotypes *in vivo***

465 *TUBA1A* has long been associated with neurodevelopment due to its spatial and temporal  
466 expression as well as its role in tubulinopathies [2-4, 17-20, 53-55], but it has been historically  
467 difficult to study the contribution of a single  $\alpha$ -tubulin isotype to microtubule network function

468 *in vivo* due to the limited availability of isotype-specific tools. Here, we present a novel tool for  
469 studying TUBA1A protein *in vivo* without impacting native microtubule properties by  
470 introducing a hexahistidine (His6) tag into a previously identified internal loop of TUBA1A (Fig.  
471 3) [25-27]. In this study, we provide the first evidence that TUBA1A is essential for regulating  
472 neuronal microtubule function to support long-distance targeting of central nervous system  
473 axons. Ectopic expression of *TUBA1A*-His6 protein in cells revealed that *TUBA1A<sup>ND</sup>* protein is  
474 approximately half as abundant as wild-type (Fig. 3D), despite similar amounts of mRNA  
475 expression in transfected cells (Fig. 3E). Based on this evidence, *TUBA1A<sup>ND</sup>* substitution causes  
476 targeted depletion of the mutant TUBA1A protein, but our results suggest that degradation by the  
477 proteasome is unlikely (Fig. 3D). Newly synthesized  $\alpha$ - and  $\beta$ -tubulin proteins enter a complex  
478 tubulin folding pathway, where they interact with cytosolic chaperonins and tubulin-binding  
479 cofactors to become folded and assembled into tubulin heterodimers [56]. As *TUBA1A<sup>ND</sup>* protein  
480 is diminished compared to wild-type, but is not proteasomally degraded, we predict that mutant  
481 *TUBA1A<sup>ND</sup>* protein may ineffectively cycle through the tubulin folding pathway. Introduction of  
482 the ND substitution into the primary yeast  $\alpha$ -tubulin, *Tub1* (*Tub1<sup>ND</sup>*) was previously shown to be  
483 lethal when combined with tubulin folding pathway mutants, providing evidence that ND  
484 substitution impairs tubulin assembly [22]. Further testing will be needed to evaluate the precise  
485 molecular mechanisms responsible for reduced *TUBA1A<sup>ND</sup>* protein in mammalian neurons, but it  
486 is evident that *Tuba1a* function is lost in the *Tuba1a<sup>ND</sup>* rodent model.

487       Neurons with reduced *Tuba1a* function exhibited accelerated microtubule polymerization  
488 compared to wild-type, but also demonstrated deficits in neurite extension likely due to the  
489 decreased axonal microtubule density (Figs. 5, 6; [24]). Additionally, *Tuba1a*-deficient  
490 microtubules were not adequate to support growth cone localization of at least one critical

491 developmental MAP associated with commissural axon pathfinding, Map1b (Fig. 7). We show  
492 that Tuba1a-rich microtubules promote axon outgrowth and pathfinding, and reduced Tuba1a  
493 was not sufficient to form forebrain commissures in *Tuba1a*<sup>ND/+</sup> mice (Figs. 1-2). Collectively,  
494 these data support the conclusion that reduced Tuba1a during neurodevelopment is adequate for  
495 cortical neuron migration [22], but does not allow for sufficient microtubule function to properly  
496 localize proteins to the growth cone for axon guidance. Thus, long range axon guidance may be  
497 exquisitely sensitive to  $\alpha$ -tubulin levels and microtubule structure.

498 Studying individual  $\alpha$ -tubulin isotypes in neurons has been historically arduous as the  
499 high degree of amino acid sequence similarity between  $\alpha$ -tubulin isotypes has prevented  
500 generation of a TUBA1A-specific antibody and has made genetically targeting a single  $\alpha$ -tubulin  
501 gene challenging. The abundance of clinically identified mutations to *TUBA1A* provide strong  
502 evidence that *TUBA1A* is a major player in both tubulinopathy and typical neurodevelopment;  
503 however, the lack of available tools to study TUBA1A *in vivo* has prevented researchers from  
504 understanding precisely how *TUBA1A* contributes to neurodevelopment. As such, previous  
505 studies of tubulinopathy mutations have relied heavily on mRNA analysis and indirect methods  
506 of evaluating TUBA1A function. Here we introduce an important advancement in the study of  
507 TUBA1A protein *in vivo*, by harnessing a previously-identified internal loop within TUBA1A  
508 that tolerates addition of small epitope tags without impacting TUBA1A incorporation or  
509 dynamics [26]. Our internal *TUBA1A-His6* construct marks an important advancement for the  
510 study of tubulinopathies and neuronal  $\alpha$ -tubulin as a whole. *TUBA1A-His6* was readily expressed  
511 in both Cos-7 cells and neurons and was able to incorporate into microtubule polymers, unlike  
512 *TUBA1A* containing a GFP fusion that prohibited incorporation into neuronal microtubules (Fig.  
513 4). Additionally, we successfully used this epitope-tagged TUBA1A to model mutant tubulin

**514** behavior *in vitro* (Figs. 3-4). Overall, this tool provides an important advancement in the study of  
**515**  $\alpha$ -tubulin protein *in vivo*, and makes interrogating the function of specific  $\alpha$ -tubulin isotypes  
**516** accessible to more researchers.

**517**

### **518 Tuba1a influences microtubule density, dynamics, and function in cells**

**519** The microtubule cytoskeleton supports a wide range of different cellular functions in  
**520** different cell types, ranging from facilitating chromosome segregation during mitosis to forming  
**521** dynamic and motile structures like the neuronal growth cone. Understanding how different cells  
**522** use the same basic building blocks to create vastly different microtubule-based structures is a  
**523** major question in microtubule biology. Many different mechanisms have been identified through  
**524** which cells can regulate microtubule network properties and overall function. We show that a  
**525** mutation which reduced Tuba1a incorporation into cellular microtubules accelerates microtubule  
**526** polymerization rates (Fig. 5). Alterations to tubulin isotype composition were previously shown  
**527** to change microtubule polymerization dynamics when the analogous mutation was made in  
**528** yeast, *Tub1<sup>ND</sup>*. A similar acceleration of microtubule polymerization was observed in *Tub1<sup>ND</sup>*  
**529** yeast mutants and was likely caused by a shift in the  $\alpha$ -tubulin isotype ratio at the protein level  
**530** [22]. We propose that this polymerization rate increase is not due to a reduction of available  
**531** cellular tubulin, but instead is due to a change in the ratio of tubulin isotypes available for  
**532** microtubule growth. This result is also supported by recent evidence showing that increased  
**533** incorporation of Tuba1a tubulin, with subsequent decreased incorporation of alternative tubulin  
**534** isotypes, slowed microtubule polymerization rates in *in vitro* reconstituted microtubules [40].  
**535** These results are fitting with the “tubulin code” model, which proposes that incorporation of  
**536** different tubulin isotypes can modify microtubule network behavior [14, 57]. Importantly,

537 previous work has shown that local changes to growth cone microtubule dynamics facilitate  
538 growth cone turning in response to extracellular cues [11, 13, 43, 45, 58, 59]. Thus,  
539 dysregulation of growth cone microtubule dynamics, as was observed in *Tuba1a*<sup>ND/+</sup> cortical  
540 neurons, could diminish the ability of developing neurons to appropriately interact with their  
541 environment. Together, these data support the conclusion that incorporation of Tuba1a  $\alpha$ -tubulin  
542 tunes neuronal microtubule polymerization rates to support neurodevelopmental processes.

543 While the abundance of acetylated tubulin was not significantly different between  
544 *Tuba1a*<sup>ND/+</sup> and wild-type growth cones, the distribution of acetylated microtubules was different  
545 by genotype (Fig. 6). Differences in distribution of acetylated tubulin within the growth cone  
546 likely reflects altered microtubule organization (Fig. 6). Acetylation is a microtubule PTM that is  
547 associated with stable microtubule populations and as such is sparse in dynamic structures like  
548 growth cones [60-65]. However, microtubule acetylation can be induced in growth cones  
549 following contact with extracellular matrix proteins and was shown to promote cortical neuron  
550 migration *in vivo* and suppress axon branching *in vitro*, demonstrating a clear role for this PTM  
551 in development [66-68]. Tubulin PTMs, like acetylation, have been shown to impact MAP-  
552 binding affinity and function, providing a clear mechanism by which changing the PTM  
553 landscape of microtubules could alter neuronal microtubule function [41, 57, 65, 69-72]. Thus,  
554 any changes to the organization or distribution of acetylated microtubules in the growth cone  
555 could impact the ability of developing neurons to appropriately navigate their environment and  
556 establish correct synaptic targets.

557 *Tuba1a*<sup>ND/+</sup> growth cones showed a significant increase in F-actin signal compared to  
558 wild-type, causing an overall shift in the growth cone microtubule-actin balance (Fig. 6). It is  
559 well established that interplay between the actin and microtubule cytoskeleton drives growth

560 cone movements in developing neurons [43, 44, 73, 74]. Growth cone microtubule  
561 polymerization has been shown to induce F-actin assembly, and coordination of actin and  
562 microtubules is regulated by interactions with MAPs to drive appropriate growth cone response  
563 [75-78]. As actin and microtubules are tightly regulated within the growth cone, it is reasonable  
564 to assume that mutations which disrupt microtubule function, like *Tuba1a*<sup>ND</sup>, likely also impact  
565 the actin cytoskeleton of developing neurons. In *Tuba1a*<sup>ND/+</sup> neurons, the actin cytoskeleton may  
566 occupy increased growth cone territory as the result of microtubule deficiencies, but additional  
567 testing of actin-response in developing *Tuba1a*<sup>ND/+</sup> neurons is needed to assess whether the  
568 increase in growth cone actin has any functional consequences. Further, we showed that  
569 *Tuba1a*<sup>ND/+</sup> neurons do not effectively localize at least one developmental MAP, Map1b, to the  
570 growth cone (Fig. 7). Map1b acts downstream of several important developmental signaling  
571 pathways to regulate function of both actin and microtubules within the growth cone, and  
572 dysregulation of this or other MAPs could therefore impact multiple cytoskeletal components  
573 [50, 51, 79]. The mechanisms by which *Tuba1a*<sup>ND</sup> induces changes to the growth cone actin  
574 cytoskeleton remain to be explored, but could reveal important insights on how microtubules and  
575 actin are coordinately regulated to support growth cone navigation.

576

### 577 **Models of Tuba1a-dysfunction reveal potential roles in developmental signaling**

578 *Tuba1a*<sup>ND/+</sup> neuronal microtubules were not sufficient to support growth cone localization  
579 of Map1b (Fig. 7). Microtubules are the tracks upon which intracellular cargo transport occurs in  
580 neurons. Here we present evidence that impaired Tuba1a function in neurons causes aberrant  
581 localization of Map1b (Fig. 7). Map1b mRNA is a known target of the mRNA transport protein  
582 FMRP and is locally translated within developing neurons [80, 81]. As we previously



**583** demonstrated that intracellular transport is impaired in developing *Tuba1a*<sup>ND/+</sup> neurons [24], this  
**584** provides a putative model by which reduced Tuba1a could lead to altered localization of  
**585** developmental MAPs. Intracellular transport is a crucial function of neuronal microtubules  
**586** throughout life; however, microtubule-based transport has been shown to be essential during  
**587** neurodevelopment [12, 82-87]. Correct localization of developmental MAPs, mRNAs and  
**588** organelles are crucial for cytoskeletal response to extracellular guidance cues [84, 86, 88-90]. In  
**589** particular, Map1b is required for neuronal response to the guidance cue, Netrin1, a key player in  
**590** commissural formation [91-96]. We showed that neuronal microtubules with reduced Tuba1a do  
**591** not support neuronal growth to the same degree as wild-type microtubules, causing shorter  
**592** neurite length and slower growth rates *in vitro* (Fig. 6). The timing of developmental processes is  
**593** crucial for effective signal transduction and supports the formation of appropriate synaptic  
**594** contacts [97, 98]. Collectively, the data presented in this study support two potential models by  
**595** which *Tuba1a*<sup>ND</sup> neuronal microtubules fail to support proper neurodevelopment. The first model  
**596** proposes that the timing of axon extension during development is crucial for effective axon  
**597** guidance, as neurons with reduced Tuba1a exhibit impaired neurite extension (Fig. 6). If neurons  
**598** lacking TUBA1A are not reaching the correct location at the correct time, it is possible that  
**599** neurons will fail to receive key developmental signals (Fig. 8). The second model posits that  
**600** neurons lacking functional TUBA1A do not have adequate intracellular transport to support  
**601** localization of critical developmental proteins (Fig. 8). Inappropriate protein localization during  
**602** critical points in axon extension and guidance could render neurons unable to respond to  
**603** incoming guidance cues, as the machinery required to induce microtubule response to  
**604** extracellular cues is absent. Importantly, these models are not mutually exclusive, as we  
**605** demonstrated that TUBA1A is crucial for both developmental protein localization and neuron

**606** outgrowth. The extent to which these processes contribute to the overall deficit in commissural  
**607** axon guidance remains to be explored in future studies.

**608**       Understanding the mechanisms by which microtubules contribute to discrete aspects of  
**609** neurodevelopment is an active area of research. Human neurodevelopmental disorders that  
**610** impact microtubule function, such as tubulinopathies, demonstrate that microtubules are critical  
**611** for proper neurodevelopment to occur. Tubulinopathy patients exhibit severe, sometimes lethal,  
**612** brain malformations that frequently impact multiple neurodevelopmental processes, including  
**613** neuronal survival, migration and axon extension [3, 6-8, 53, 99-101]. The range of phenotypes  
**614** exhibited by tubulinopathy patients have made it challenging for scientists to pinpoint specific  
**615** aspects of neuronal function that are reliant on TUBA1A tubulin. In this way, mutations such as  
**616** the *Tuba1a*<sup>ND</sup> variant whose severity can be tuned according to gene dosage can be used as  
**617** important tools to interrogate the requirement for Tuba1a in discrete aspects of  
**618** neurodevelopment. Importantly, though tubulinopathy patients exhibit a range of brain  
**619** phenotypes, commissural abnormalities such as agenesis of the corpus callosum, are one of the  
**620** most commonly reported features of this disease [1-4, 20]. Cortical malformations and neuronal  
**621** migration errors are also common features of *TUBA1A* tubulinopathies; however, it has thus far  
**622** been unclear as to whether commissural deficits occur as a primary or secondary consequence of  
**623** *TUBA1A* dysfunction. In this study, we provide evidence that neurons deficient in Tuba1a fail to  
**624** properly navigate to meet contralateral binding partners. These data demonstrate that *TUBA1A*  
**625** is required for forebrain commissural formation, independent of its role in neuronal survival or  
**626** migration. The insights presented in this manuscript expand upon the currently known role for  
**627** *TUBA1A* in neurodevelopment, and advance the study of tubulinopathy by presenting specific  
**628** mechanisms by which *TUBA1A* supports neurodevelopment.

**629** References:

- 630** 1. Cushion, T.D., et al., *Overlapping cortical malformations and mutations in TUBB2B and*  
**631** *TUBA1A*. Brain, 2013. 136(Pt 2): p. 536-48.
- 632** 2. Oegema, R., et al., *Recognizable cerebellar dysplasia associated with mutations in*  
**633** *multiple tubulin genes*. Hum Mol Genet, 2015. 24(18): p. 5313-25.
- 634** 3. Fallet-Bianco, C., et al., *Neuropathological phenotype of a distinct form of lissencephaly*  
**635** *associated with mutations in TUBA1A*. Brain, 2008. 131(Pt 9): p. 2304-20.
- 636** 4. Poirier, K., et al., *Large spectrum of lissencephaly and pachygyria phenotypes resulting*  
**637** *from de novo missense mutations in tubulin alpha 1A (TUBA1A)*. Hum Mutat, 2007.  
**638** 28(11): p. 1055-64.
- 639** 5. Tischfield, M.A., et al., *Phenotypic spectrum of the tubulin-related disorders and*  
**640** *functional implications of disease-causing mutations*. Curr Opin Genet Dev, 2011. 21(3):  
**641** p. 286-94.
- 642** 6. Tian, G., et al., *Disease-associated mutations in TUBA1A result in a spectrum of defects*  
**643** *in the tubulin folding and heterodimer assembly pathway*. Hum Mol Genet, 2010. 19(18):  
**644** p. 3599-613.
- 645** 7. Tian, G., et al., *A pachygyria-causing alpha-tubulin mutation results in inefficient cycling*  
**646** *with CCT and a deficient interaction with TBCB*. Mol Biol Cell, 2008. 19(3): p. 1152-61.
- 647** 8. Aiken, J., J.K. Moore, and E.A. Bates, *TUBA1A mutations identified in lissencephaly*  
**648** *patients dominantly disrupt neuronal migration and impair dynein activity*. Hum Mol  
**649** Genet, 2019. 28(8): p. 1227-1243.
- 650** 9. Aiken, J., et al., *Tubulin mutations in brain development disorders: Why*  
**651** *haploinsufficiency does not explain TUBA1A tubulinopathies*. Cytoskeleton (Hoboken),  
**652** 2019.
- 653** 10. Kapitein, L.C. and C.C. Hoogenraad, *Building the Neuronal Microtubule Cytoskeleton*.  
**654** Neuron, 2015. 87(3): p. 492-506.
- 655** 11. Liu, G. and T. Dwyer, *Microtubule dynamics in axon guidance*. Neurosci Bull, 2014.  
**656** 30(4): p. 569-83.

- 657** 12. Miller, K.E. and D.M. Suter, *An Integrated Cytoskeletal Model of Neurite Outgrowth*.  
**658** Front Cell Neurosci, 2018. 12: p. 447.
- 659** 13. Sakakibara, A., et al., *Microtubule dynamics in neuronal morphogenesis*. Open Biol,  
**660** 2013. 3(7): p. 130061.
- 661** 14. Gadadhar, S., et al., *The tubulin code at a glance*. J Cell Sci, 2017. 130(8): p. 1347-1353.
- 662** 15. Khodiyar, V.K., et al., *A revised nomenclature for the human and rodent alpha-tubulin*  
**663** *gene family*. Genomics, 2007. 90(2): p. 285-9.
- 664** 16. Findeisen, P., et al., *Six subgroups and extensive recent duplications characterize the*  
**665** *evolution of the eukaryotic tubulin protein family*. Genome Biol Evol, 2014. 6(9): p.  
**666** 2274-88.
- 667** 17. Gloster, A., et al., *Early induction of Talpha1 alpha-tubulin transcription in neurons of*  
**668** *the developing nervous system*. J Comp Neurol, 1999. 405(1): p. 45-60.
- 669** 18. Gloster, A., et al., *The T alpha 1 alpha-tubulin promoter specifies gene expression as a*  
**670** *function of neuronal growth and regeneration in transgenic mice*. J Neurosci, 1994.  
**671** 14(12): p. 7319-30.
- 672** 19. Miller, F.D., et al., *Isotypes of alpha-tubulin are differentially regulated during neuronal*  
**673** *maturation*. J Cell Biol, 1987. 105(6 Pt 2): p. 3065-73.
- 674** 20. Aiken, J., et al., *The alpha-Tubulin gene TUBA1A in Brain Development: A Key*  
**675** *Ingredient in the Neuronal Isotype Blend*. J Dev Biol, 2017. 5(3).
- 676** 21. Bittermann, E., et al., *Differential requirements of tubulin genes in mammalian forebrain*  
**677** *development*. PLoS genetics, 2019. 15(8): p. e1008243-e1008243.
- 678** 22. Gartz Hanson, M., et al., *Novel alpha-tubulin mutation disrupts neural development and*  
**679** *tubulin proteostasis*. Dev Biol, 2016. 409(2): p. 406-19.
- 680** 23. Keays, D.A., et al., *Mutations in alpha-tubulin cause abnormal neuronal migration in*  
**681** *mice and lissencephaly in humans*. Cell, 2007. 128(1): p. 45-57.

- 682** 24. Buscaglia, G., et al., *Reduced TUBA1A tubulin causes defects in trafficking and impaired*  
**683** *adult motor behavior*. eNeuro, 2020.
- 684** 25. Heilemann, M., et al., *Subdiffraction-resolution fluorescence imaging with conventional*  
**685** *fluorescent probes*. Angewandte Chemie (International ed. in English), 2008. 47(33): p.  
**686** 6172-6176.
- 687** 26. Schatz, P.J., et al., *Insertions of up to 17 amino acids into a region of alpha-tubulin do*  
**688** *not disrupt function in vivo*. Molecular and cellular biology, 1987. 7(10): p. 3799-3805.
- 689** 27. Hotta, T., et al., *Affinity Purification and Characterization of Functional Tubulin from*  
**690** *Cell Suspension Cultures of Arabidopsis and Tobacco*. Plant physiology, 2016. 170(3): p.  
**691** 1189-1205.
- 692** 28. Anders, K.R. and D. Botstein, *Dominant-lethal alpha-tubulin mutants defective in*  
**693** *microtubule depolymerization in yeast*. Mol Biol Cell, 2001. 12(12): p. 3973-86.
- 694** 29. Roostalu, J., et al., *The speed of GTP hydrolysis determines GTP cap size and controls*  
**695** *microtubule stability*. Elife, 2020. 9.
- 696** 30. Johnson, V., et al., *Design, overexpression, and purification of polymerization-blocked*  
**697** *yeast  $\alpha$ -tubulin mutants*. Biochemistry, 2011. 50(40): p. 8636-44.
- 698** 31. Ōmura, S. and A. Crump, *Lactacystin: first-in-class proteasome inhibitor still excelling*  
**699** *and an exemplar for future antibiotic research*. The Journal of Antibiotics, 2019. 72(4):  
**700** p. 189-201.
- 701** 32. Tomoda, H. and S. Omura, *Lactacystin, a proteasome inhibitor: discovery and its*  
**702** *application in cell biology*. Yakugaku zasshi : Journal of the Pharmaceutical Society of  
**703** Japan, 2000. 120(10): p. 935-949.
- 704** 33. Vallee, R.B., *A taxol-dependent procedure for the isolation of microtubules and*  
**705** *microtubule-associated proteins (MAPs)*. J Cell Biol, 1982. 92(2): p. 435-42.
- 706** 34. Nishikimi, M., K. Oishi, and K. Nakajima, *Axon guidance mechanisms for establishment*  
**707** *of callosal connections*. Neural Plast, 2013. 2013: p. 149060.

- 708** 35. Probst, M., *Über den Bau des balkenlosen Grobhirns, sowie über Mikrogyrie and*  
**709** *Heterotypie der grauer Substanz.* Arch F Psychiatr, 1901(34): p. 709-786.
- 710** 36. Kimble, M., et al., *Microtubule organization and the effects of GFP-tubulin expression in*  
**711** *dictyostelium discoideum.* Cell motility and the cytoskeleton, 2000. 47(1): p. 48-62.
- 712** 37. Zieve, G. and F. Solomon, *Direct isolation of neuronal microtubule skeletons.* Mol Cell  
**713** Biol, 1984. 4(2): p. 371-4.
- 714** 38. Wloga, D., E. Joachimiak, and H. Fabczak, *Tubulin Post-Translational Modifications*  
**715** *and Microtubule Dynamics.* Int J Mol Sci, 2017. 18(10).
- 716** 39. Zanic, M., *Measuring the Effects of Microtubule-Associated Proteins on Microtubule*  
**717** *Dynamics In Vitro.* Methods Mol Biol, 2016. 1413: p. 47-61.
- 718** 40. Vemu, A., et al., *Tubulin isoform composition tunes microtubule dynamics.* Mol Biol  
**719** Cell, 2017. 28(25): p. 3564-3572.
- 720** 41. Sirajuddin, M., L.M. Rice, and R.D. Vale, *Regulation of microtubule motors by tubulin*  
**721** *isotypes and post-translational modifications.* Nat Cell Biol, 2014. 16(4): p. 335-44.
- 722** 42. Honnappa, S., et al., *An EBI-Binding Motif Acts as a Microtubule Tip Localization*  
**723** *Signal.* Cell, 2009. 138(2): p. 366-376.
- 724** 43. Craig, E.M., *Model for Coordination of Microtubule and Actin Dynamics in Growth*  
**725** *Cone Turning.* Frontiers in cellular neuroscience, 2018. 12: p. 394-394.
- 726** 44. Dent, E.W., S.L. Gupton, and F.B. Gertler, *The growth cone cytoskeleton in axon*  
**727** *outgrowth and guidance.* Cold Spring Harb Perspect Biol, 2011. 3(3).
- 728** 45. Buck, K.B. and J.Q. Zheng, *Growth cone turning induced by direct local modification of*  
**729** *microtubule dynamics.* The Journal of neuroscience : the official journal of the Society  
**730** for Neuroscience, 2002. 22(21): p. 9358-9367.
- 731** 46. Meixner, A., et al., *MAP1B is required for axon guidance and Is involved in the*  
**732** *development of the central and peripheral nervous system.* J Cell Biol, 2000. 151(6): p.  
**733** 1169-78.

- 734** 47. Gonzalez-Billault, C., J. Avila, and A. Caceres, *Evidence for the role of MAP1B in axon*  
**735** *formation*. Mol Biol Cell, 2001. 12(7): p. 2087-98.
- 736** 48. Black, M.M., T. Slaughter, and I. Fischer, *Microtubule-associated protein 1b (MAP1b) is*  
**737** *concentrated in the distal region of growing axons*. The Journal of neuroscience : the  
**738** *official journal of the Society for Neuroscience*, 1994. 14(2): p. 857-870.
- 739** 49. González-Billault, C., et al., *Participation of structural microtubule-associated proteins*  
**740** *(MAPs) in the development of neuronal polarity*. Journal of neuroscience research, 2002.  
**741** 67(6): p. 713-719.
- 742** 50. Mack, T.G., M.P. Koester, and G.E. Pollerberg, *The microtubule-associated protein*  
**743** *MAP1B is involved in local stabilization of turning growth cones*. Molecular and cellular  
**744** *neurosciences*, 2000. 15(1): p. 51-65.
- 745** 51. Tymanskyj, S.R., T.M. Scales, and P.R. Gordon-Weeks, *MAP1B enhances microtubule*  
**746** *assembly rates and axon extension rates in developing neurons*. Mol Cell Neurosci, 2012.  
**747** 49(2): p. 110-9.
- 748** 52. Del Rio, J.A., et al., *MAP1B is required for Netrin 1 signaling in neuronal migration and*  
**749** *axonal guidance*. Curr Biol, 2004. 14(10): p. 840-50.
- 750** 53. Kumar, R.A., et al., *TUBA1A mutations cause wide spectrum lissencephaly (smooth*  
**751** *brain) and suggest that multiple neuronal migration pathways converge on alpha*  
**752** *tubulins*. Hum Mol Genet, 2010. 19(14): p. 2817-27.
- 753** 54. Lecourtois, M., et al., *Human lissencephaly with cerebellar hypoplasia due to mutations*  
**754** *in TUBA1A: expansion of the foetal neuropathological phenotype*. Acta Neuropathol,  
**755** 2010. 119(6): p. 779-89.
- 756** 55. Bamji, S.X. and F.D. Miller, *Comparison of the expression of a T alpha 1:nlacZ*  
**757** *transgene and T alpha 1 alpha-tubulin mRNA in the mature central nervous system*. J  
**758** *Comp Neurol*, 1996. 374(1): p. 52-69.
- 759** 56. Lewis, S.A., G. Tian, and N.J. Cowan, *The alpha- and beta-tubulin folding pathways*.  
**760** Trends Cell Biol, 1997. 7(12): p. 479-84.
- 761** 57. Janke, C. and M. Kneussel, *Tubulin post-translational modifications: encoding functions*  
**762** *on the neuronal microtubule cytoskeleton*. Trends Neurosci, 2010. 33(8): p. 362-72.

- 763** 58. Fassier, C., et al., *Motor axon navigation relies on Fidgetin-like 1-driven microtubule*  
**764** *plus end dynamics*. J Cell Biol, 2018. 217(5): p. 1719-1738.
- 765** 59. Kiss, A., et al., *Neuronal Growth Cone Size-Dependent and -Independent Parameters of*  
**766** *Microtubule Polymerization*. Front Cell Neurosci, 2018. 12: p. 195.
- 767** 60. Baas, P.W., et al., *Stability properties of neuronal microtubules*. Cytoskeleton  
**768** (Hoboken), 2016. 73(9): p. 442-60.
- 769** 61. Eshun-Wilson, L., et al., *Effects of  $\alpha$ -tubulin acetylation on microtubule structure and*  
**770** *stability*. Proceedings of the National Academy of Sciences of the United States of  
**771** America, 2019. 116(21): p. 10366-10371.
- 772** 62. Palazzo, A., B. Ackerman, and G.G. Gundersen, *Cell biology: Tubulin acetylation and*  
**773** *cell motility*. Nature, 2003. 421(6920): p. 230.
- 774** 63. Robson, S.J. and R.D. Burgoyne, *Differential localisation of tyrosinated, detyrosinated,*  
**775** *and acetylated alpha-tubulins in neurites and growth cones of dorsal root ganglion*  
**776** *neurons*. Cell motility and the cytoskeleton, 1989. 12(4): p. 273-282.
- 777** 64. Schulze, E., et al., *Posttranslational modification and microtubule stability*. J Cell Biol,  
**778** 1987. 105(5): p. 2167-77.
- 779** 65. Mansfield, S.G. and P.R. Gordon-Weeks, *Dynamic post-translational modification of*  
**780** *tubulin in rat cerebral cortical neurons extending neurites in culture: effects of taxol*.  
**781** Journal of neurocytology, 1991. 20(8): p. 654-666.
- 782** 66. Creppe, C., et al., *Elongator controls the migration and differentiation of cortical*  
**783** *neurons through acetylation of alpha-tubulin*. Cell, 2009. 136(3): p. 551-64.
- 784** 67. Dan, W., et al.,  *$\alpha$ -Tubulin Acetylation Restricts Axon Overbranching by Dampening*  
**785** *Microtubule Plus-End Dynamics in Neurons*. Cerebral cortex (New York, N.Y. : 1991),  
**786** 2018. 28(9): p. 3332-3346.
- 787** 68. Bergstrom, R.A., R.C. Sinjoanu, and A. Ferreira, *Agrin induced morphological and*  
**788** *structural changes in growth cones of cultured hippocampal neurons*. Neuroscience,  
**789** 2007. 149(3): p. 527-536.



- 790** 69. Balabanian, L., C.L. Berger, and A.G. Hendricks, *Acetylated Microtubules Are*  
**791** *Preferentially Bundled Leading to Enhanced Kinesin-1 Motility*. Biophysical journal,  
**792** 2017. 113(7): p. 1551-1560.
- 793** 70. Bonnet, C., et al., *Differential binding regulation of microtubule-associated proteins*  
**794** *MAP1A, MAP1B, and MAP2 by tubulin polyglutamylation*. J Biol Chem, 2001. 276(16):  
**795** p. 12839-48.
- 796** 71. Lacroix, B., et al., *Tubulin polyglutamylation stimulates spastin-mediated microtubule*  
**797** *severing*. J Cell Biol, 2010. 189(6): p. 945-54.
- 798** 72. Reed, N.A., et al., *Microtubule acetylation promotes kinesin-1 binding and transport*.  
**799** Curr Biol, 2006. 16(21): p. 2166-72.
- 800** 73. Dent, E.W. and K. Kalil, *Axon branching requires interactions between dynamic*  
**801** *microtubules and actin filaments*. J Neurosci, 2001. 21(24): p. 9757-69.
- 802** 74. Piper, M., et al., *Differential requirement of F-actin and microtubule cytoskeleton in cue-*  
**803** *induced local protein synthesis in axonal growth cones*. Neural Dev, 2015. 10: p. 3.
- 804** 75. Rochlin, M.W., M.E. Dailey, and P.C. Bridgman, *Polymerizing microtubules activate*  
**805** *site-directed F-actin assembly in nerve growth cones*. Molecular biology of the cell,  
**806** 1999. 10(7): p. 2309-2327.
- 807** 76. Biswas, S. and K. Kalil, *The Microtubule-Associated Protein Tau Mediates the*  
**808** *Organization of Microtubules and Their Dynamic Exploration of Actin-Rich*  
**809** *Lamellipodia and Filopodia of Cortical Growth Cones*. J Neurosci, 2018. 38(2): p. 291-  
**810** 307.
- 811** 77. Slater, P.G., et al., *XMAP215 promotes microtubule-F-actin interactions to regulate*  
**812** *growth cone microtubules during axon guidance in Xenopus laevis*. Journal of cell  
**813** science, 2019. 132(9): p. jcs224311.
- 814** 78. Szikora, S., et al., *The formin DAAM is required for coordination of the actin and*  
**815** *microtubule cytoskeleton in axonal growth cones*. Journal of cell science, 2017. 130(15):  
**816** p. 2506-2519.
- 817** 79. Noiges, R., et al., *Microtubule-associated protein 1A (MAP1A) and MAP1B: light chains*  
**818** *determine distinct functional properties*. J Neurosci, 2002. 22(6): p. 2106-14.

- 819** 80. Lu, R., et al., *The fragile X protein controls microtubule-associated protein 1B*  
**820** *translation and microtubule stability in brain neuron development.* Proc Natl Acad Sci U  
**821** S A, 2004. 101(42): p. 15201-6.
- 822** 81. Wang, B., et al., *FMRP-Mediated Axonal Delivery of miR-181d Regulates Axon*  
**823** *Elongation by Locally Targeting Map1b and Calm1.* Cell Rep, 2015. 13(12): p. 2794-  
**824** 807.
- 825** 82. Baraban, M., et al., *Zebrafish embryonic neurons transport messenger RNA to axons and*  
**826** *growth cones in vivo.* J Neurosci, 2013. 33(40): p. 15726-34.
- 827** 83. Dent, E.W. and P.W. Baas, *Microtubules in neurons as information carriers.* J  
**828** Neurochem, 2014. 129(2): p. 235-9.
- 829** 84. Feltrin, D., et al., *Growth cone MKK7 mRNA targeting regulates MAP1b-dependent*  
**830** *microtubule bundling to control neurite elongation.* PLoS Biol, 2012. 10(12): p.  
**831** e1001439.
- 832** 85. Hoogenraad, C.C. and F. Bradke, *Control of neuronal polarity and plasticity--a*  
**833** *renaissance for microtubules?* Trends Cell Biol, 2009. 19(12): p. 669-76.
- 834** 86. Leung, K.M., et al., *Cue-Polarized Transport of beta-actin mRNA Depends on 3'UTR and*  
**835** *Microtubules in Live Growth Cones.* Front Cell Neurosci, 2018. 12: p. 300.
- 836** 87. Liu, J.S., et al., *Molecular basis for specific regulation of neuronal kinesin-3 motors by*  
**837** *doublecortin family proteins.* Mol Cell, 2012. 47(5): p. 707-21.
- 838** 88. Pilaz, L.J., et al., *Dynamic mRNA Transport and Local Translation in Radial Glial*  
**839** *Progenitors of the Developing Brain.* Curr Biol, 2016. 26(24): p. 3383-3392.
- 840** 89. Qu, C., et al., *Direct binding of TUBB3 with DCC couples netrin-1 signaling to*  
**841** *intracellular microtubule dynamics in axon outgrowth and guidance.* J Cell Sci, 2013.  
**842** 126(Pt 14): p. 3070-81.
- 843** 90. Welshhans, K. and G.J. Bassell, *Netrin-1-induced local beta-actin synthesis and growth*  
**844** *cone guidance requires zipcode binding protein 1.* J Neurosci, 2011. 31(27): p. 9800-13.

- 845** 91. Arbeille, E. and G.J. Bashaw, *Brain Tumor promotes axon growth across the midline*  
**846** *through interactions with the microtubule stabilizing protein Apc2*. PLoS Genet, 2018.  
**847** 14(4): p. e1007314.
- 848** 92. Barallobre, M.J., et al., *Aberrant development of hippocampal circuits and altered neural*  
**849** *activity in netrin 1-deficient mice*. Development, 2000. 127(22): p. 4797-810.
- 850** 93. Finger, J.H., et al., *The netrin 1 receptors Unc5h3 and Dcc are necessary at multiple*  
**851** *choice points for the guidance of corticospinal tract axons*. J Neurosci, 2002. 22(23): p.  
**852** 10346-56.
- 853** 94. Fothergill, T., et al., *Netrin-DCC signaling regulates corpus callosum formation through*  
**854** *attraction of pioneering axons and by modulating Slit2-mediated repulsion*. Cereb  
**855** Cortex, 2014. 24(5): p. 1138-51.
- 856** 95. Lindwall, C., T. Fothergill, and L.J. Richards, *Commissure formation in the mammalian*  
**857** *forebrain*. Curr Opin Neurobiol, 2007. 17(1): p. 3-14.
- 858** 96. Serafini, T., et al., *Netrin-1 is required for commissural axon guidance in the developing*  
**859** *vertebrate nervous system*. Cell, 1996. 87(6): p. 1001-14.
- 860** 97. Krol, A. and G. Feng, *Windows of opportunity: timing in neurodevelopmental disorders*.  
**861** Current opinion in neurobiology, 2018. 48: p. 59-63.
- 862** 98. Rossi, A.M., V.M. Fernandes, and C. Desplan, *Timing temporal transitions during brain*  
**863** *development*. Current opinion in neurobiology, 2017. 42: p. 84-92.
- 864** 99. Bamba, Y., et al., *In vitro characterization of neurite extension using induced pluripotent*  
**865** *stem cells derived from lissencephaly patients with TUBA1A missense mutations*. Mol  
**866** Brain, 2016. 9(1): p. 70.
- 867** 100. Belvindrah, R., et al., *Mutation of the alpha-tubulin Tuba1a leads to straighter*  
**868** *microtubules and perturbs neuronal migration*. J Cell Biol, 2017.
- 869** 101. Keays, D.A., et al., *The role of Tuba1a in adult hippocampal neurogenesis and the*  
**870** *formation of the dentate gyrus*. Dev Neurosci, 2010. 32(4): p. 268-77.  
**871**
